# Supplementary material for: Evaluation of Population-Level Tobacco Control Interventions and Health Outcomes: A Systematic Review and Meta-Analysis
Source: PubMed Central journal article supplement (PMC10329215; doi:10.1001/jamanetworkopen.2023.22341), 2023-07-07
Supplement: jamanetwopen-e2322341-s001.pdf [file jamanetwopen-e2322341-s001.pdf]

## Supplemental Online Content

Akter S, Islam R, Rahman M, et al. Evaluation of population-level tobacco control interventions and health outcomes: a systematic review and meta-analysis. *JAMA Netw Open.* 2023;6(7):e2322341. doi:10.1001/jamanetworkopen.2023.22341

**eTable 1.** Synthesis Past Evidence

**eTable 2.** PubMed Search Results

**eTable 3.** EMBASE Search Results

**eTable 4.** Web of Science Search Results

**eTable 5.** CINAHL Search Results

**eTable 6.** EconLit Search Results

**eAppendix 1.** Data Extraction Form

**eAppendix 2.** Study Quality Assessment

**eFigure 1.** Study Selection Flowchart

**eTable 7.** Study Characteristics

**eFigure 2.** Forest Plot of Meta-analysis of the Studies Examining the Associations of Smoke-free Legislation With Cardiovascular Disease (CVD), CVD Hospitalization, Respiratory Disease Hospitalization, CVD Mortality, Cancer, Respiratory Symptoms, Birth Weight, and Gestational Age Based on Coefficient Results

**eFigure 3.** Meta-analysis of the Association of Smoke-free Legislation With Perinatal Mortality and Adverse Birth Outcomes

**eFigure 4.** Forest Plot of Meta-analysis of Studies Examining the Association of Tax or Price Increase With Hospitalization Due to Cardiovascular Disease or Respiratory Symptoms

**eFigure 5.** Forest Plot of Meta-analysis of the Studies Examining the Association of Tax or Price Increase With Total Mortality, Cardiovascular Disease Mortality, Cancer Mortality, Respiratory Disease Mortality, Cardiovascular Disease Hospitalization, and Respiratory Disease Hospitalization Based on Coefficient Results

**eFigure 6.** Forest Plot of Meta-analysis of Studies Examining the Synergistic Associations of Tobacco Control Program (Combination of Several Tobacco Control Laws) With Cardiovascular Disease Hospitalization, Cardiovascular Disease Mortality, and Cancer Based on Coefficient Results

**eAppendix 3.** Sensitivity Analyses

**eFigure 7.** Publication Bias Assessment for Cardiovascular Diseases

**eFigure 8.** Publication Bias Assessment for Smoke-free Legislation and Respiratory Disease and Symptoms

**eFigure 9.** Publication Bias Assessment for Smoke-free Legislation and Perinatal Mortality and Adverse Birth Outcomes

**eTable 8.** Summary, Publication Bias, and Trim-and-Fill Estimates

**eAppendix 4.** Stratified Analysis

**eTable 9.** Stratified Analysis According to Study Design, Country Income Category and Quality Score

**eTable 10.** Stratified Analysis According to Comprehensiveness of Smoke-free Legislation

**eTable 11.** Narrative Summary of Adverse Health Outcomes Following the Implementation of the Smoking Ban

**eTable 12.** Narrative Summary of Adverse Health Outcomes Following the Implementation of Tobacco Law

**eTable 13.** Narrative Summary of Adverse Health Outcomes Following the Implementation of an Increase in Cigarette Prices or Cigarette Taxes

**eTable 14.** Narrative Summary of Adverse Health Outcomes Following the Implementation of Miscellaneous Policies

**eReferences.**

This supplemental material has been provided by the authors to give readers additional information about their work.

**eTable 1.** Synthesis Past Evidence

| Study                     | # studies    | Participant | Policy | Impact                                                                                                                                                                                                                                                                                                    |
|---------------------------|--------------|-------------|--------|-----------------------------------------------------------------------------------------------------------------------------------------------------------------------------------------------------------------------------------------------------------------------------------------------------------|
| Been et al. (2014)        | 11 (SR & MA) | Children    | SL     | Preterm birth (↓), LBW (×), VLBW (×), SGA (×), very SGA (↓), asthma admissions (↓)                                                                                                                                                                                                                        |
| Dinno & Glantz (2007)     | 4 (MA)       | All         | SL     | Coronary heart disease admissions (↓)                                                                                                                                                                                                                                                                     |
| Faber et al. (2017)       | 41 (SR & MA) | Children    | TCP    | Stillbirth (×), gestational age (×), very preterm birth (↓), birthweight (↑), LBW (↓), VLBW (×), SGA (↓), very SGA (×), congenital anomalies (×), early neonatal mortality (×), infant mortality (×), wheezing/asthma (×), respiratory infections (×)                                                     |
| Frazer et al. (2016)      | 72 (SR)      | All         | SL     | AMI (×), ACS (×), stroke (×), cerebral infarction (×), COPD (×), asthma (×) admissions, lung function (×), mortality rate (AMI, IHD, stroke, COPD) (×), LBW (×), VLBW (×), preterm birth (×), SGA (×)                                                                                                     |
| Gao et al (2019)          | 11 (MA)      | All         | SL     | AMI mortality (↓)                                                                                                                                                                                                                                                                                         |
| Jones et al (2014)        | 31 (SR & MA) | All         | SL     | ACE admissions (↓)                                                                                                                                                                                                                                                                                        |
| Lightwood & Glantz (2009) | 9 (MA)       | All         | SL     | AMI admissions (↓)                                                                                                                                                                                                                                                                                        |
| Lin et al. (2013)         | 18 (SR & MA) | All         | SL     | AMI admissions (↓)                                                                                                                                                                                                                                                                                        |
| Mackay et al. (2010)      | 17 (MA)      | Adults      | SL     | ACE admissions (↓)                                                                                                                                                                                                                                                                                        |
| Meyers et al (2009)       | 10 (SR & MA) | All         | SL     | AMI admissions (↓)                                                                                                                                                                                                                                                                                        |
| Rando-Matos et al (2017)  | 50 (SR & MA) | All         | SL     | Respiratory symptoms (↓), sensory symptoms (↓)                                                                                                                                                                                                                                                            |
| Tan & Glantz (2012)       | 55 (MA)      | All         | SL     | Coronary events (AMI, ACS, ACE, IHD) (↓), other heart diseases [angina, coronary heart disease, sudden cardiac death (not admission)] (↓), cerebrovascular accidents (stroke, transient ischemic attack) (↓), respiratory disease (COPD, asthma, lung infection, spontaneous pneumothorax) (↓) admissions |

MA, meta-analysis; SR, systematic review.

SL, Smoke-free legislation; TCP, Tobacco control policies.

LBW, low birthweight; VLBW, very low birthweight; SGA, small for gestational age; AMI, acute myocardial infarction; ACS, acute coronary syndrome; ACE, acute coronary events; COPD, chronic obstructive pulmonary disease; IHD, ischemic heart disease.

↓ indicate decrease, ↑ increase, × no clear association

**eTable 2.** PubMed Search Results

| Search | Query                                                                                                                                                                                                                                                                                                                                                                                                                                                                                                                                                                                                                                                                                                                           | 12 Feb 2021 | 1 Mar 2022 |
|--------|---------------------------------------------------------------------------------------------------------------------------------------------------------------------------------------------------------------------------------------------------------------------------------------------------------------------------------------------------------------------------------------------------------------------------------------------------------------------------------------------------------------------------------------------------------------------------------------------------------------------------------------------------------------------------------------------------------------------------------|-------------|------------|
| #5     | Search: #1 AND #2 AND #3 AND #4                                                                                                                                                                                                                                                                                                                                                                                                                                                                                                                                                                                                                                                                                                 | 2,817       | 4,392      |
| #4     | Search: "epidemiologic studies"[MeSH] OR "epidemiologic stud*" [tw] OR "case control stud*" [tw] OR "case-control stud*" [tw] OR "cross-sectional studies"[MeSH] OR "cross-sectional stud*" [tw] OR "cross sectional stud" [tw] OR "cohort studies"[MeSH] OR "cohort stud*" [tw] OR cohort analy* [tw] OR "follow up stud*" [tw] OR "longitudinal stud*" [tw] OR "retrospective stud*" [tw] OR "prospective stud*" [tw] OR "observational stud*" [tw] OR "interrupted time series analysis"[MeSH Terms] OR "interrupted time series" [tw] OR "correlational" [tw] OR "descriptive stud*" [tw] OR "controlled before and after" [tw] OR "before and after study" [tw] OR "quasi-experimental" [tw] OR "quasi experimental*" [tw] | 30,34,528   | 3,340,737  |
| #3     | Search: polic* OR intervention [tw] OR lobb* OR influence [tw] OR public policy [tw] OR law [tw] OR strategy [tw] OR strategies [tw] OR initiatives [tw] OR regulation [tw] OR actions [tw] OR plan [tw] OR "action plan" [tw] OR effects [tw]                                                                                                                                                                                                                                                                                                                                                                                                                                                                                  | 8,888,682   | 10,888,682 |
| #2     | Search: taxation [tw] OR tax [tw] OR taxes [tw] taxed [tw] taxing [tw] OR excise [tw] OR cost [tw] OR price [tw] OR prices [tw] OR pricing [tw] OR Price increase [tw] OR promotion [tw] OR discount [tw] OR campaigns [tw] OR campaign [tw] OR ban [tw] OR partial ban [tw] OR full ban [tw] OR advertising [tw] OR advertisement [tw] OR tobacco control law [tw] OR smoke free law [tw] OR mass media [tw] OR pictorial warning [tw] OR health warning [tw] OR pictorial health warning [tw] OR graphic health warning [tw] OR graphic warning [tw] OR legal age [tw]                                                                                                                                                        | 249,818     | 843,589    |
| #1     | Search: smoking [MeSH] OR smoking [tw] OR tobacco [MeSH] OR tobacco [tw] OR "tobacco use" [tw] OR "tobacco use disorder" [MeSH] OR "tobacco use disorder" [tw] OR "tobacco dependence" [tw] OR "smoking dependence" [tw] OR cigarette [MeSH] OR cigarette [tw] OR nicotine [MeSH] OR nicotine dependence [tw]                                                                                                                                                                                                                                                                                                                                                                                                                   | 376,433     | 397,924    |

**eTable 3.** EMBASE Search Results

| No. | Query                                                                                                                                                                                                                                                                                                                                                                                                                                                                                                                                                                                                                                                                                                                                                                                                                                                                                                   | 12 Feb 2021 |
|-----|---------------------------------------------------------------------------------------------------------------------------------------------------------------------------------------------------------------------------------------------------------------------------------------------------------------------------------------------------------------------------------------------------------------------------------------------------------------------------------------------------------------------------------------------------------------------------------------------------------------------------------------------------------------------------------------------------------------------------------------------------------------------------------------------------------------------------------------------------------------------------------------------------------|-------------|
| #5  | #1 AND #2 AND #3 AND #4                                                                                                                                                                                                                                                                                                                                                                                                                                                                                                                                                                                                                                                                                                                                                                                                                                                                                 | 134         |
| #4  | (('epidemiologic studies':ti,ab,kw OR 'epidemiologic study':ti,ab,kw OR 'case control study':ti,ab,kw OR 'case control studies':ti,ab,kw OR 'case-control study':ti,ab,kw OR 'cross-sectional studies':ti,ab,kw OR 'cross-sectional study':ti,ab,kw OR 'cross sectional stud':ti,ab,kw OR 'cohort studies':ti,ab,kw OR 'cohort analysis':ti,ab,kw OR 'cohort study':ti,ab,kw OR 'follow up study':ti,ab,kw OR 'longitudinal study':ti,ab,kw OR 'retrospective study':ti,ab,kw OR 'prospective study':ti,ab,kw OR 'observational study':ti,ab,kw OR 'interrupted time series analysis':ti,ab,kw OR 'interrupted time series':ti,ab,kw OR 'correlational':ti,ab,kw OR 'descriptive study':ti,ab,kw OR 'descriptive studies':ti,ab,kw OR 'controlled before':ti,ab,kw) AND after:ti,ab,kw OR before:ti,ab,kw) AND 'after study':ti,ab,kw OR 'quasi-experimental':ti,ab,kw OR 'quasi experimental':ti,ab,kw | 22,095      |
| #3  | 'policy':ti,ab,kw OR 'policies':ti,ab,kw OR 'intervention':ti,ab,kw OR 'lobbies':ti,ab,kw OR 'lobby':ti,ab,kw OR 'influence':ti,ab,kw OR 'public policy':ti,ab,kw OR 'law':ti,ab,kw OR 'strategy':ti,ab,kw OR 'strategies':ti,ab,kw OR 'initiatives':ti,ab,kw OR 'regulation':ti,ab,kw OR 'actions':ti,ab,kw OR 'plan':ti,ab,kw OR 'action plan':ti,ab,kw OR 'campaigns':ti,ab,kw OR 'campaign':ti,ab,kw                                                                                                                                                                                                                                                                                                                                                                                                                                                                                                | 5,143,713   |
| #2  | 'taxation':ti,ab,kw OR 'tax':ti,ab,kw OR 'taxes':ti,ab,kw OR 'taxed':ti,ab,kw OR 'taxing':ti,ab,kw OR 'excise':ti,ab,kw OR 'cost':ti,ab,kw OR 'price':ti,ab,kw OR 'prices':ti,ab,kw OR 'pricing':ti,ab,kw OR 'promotion':ti,ab,kw OR 'discount':ti,ab,kw OR 'campaigns':ti,ab,kw OR 'campaign':ti,ab,kw                                                                                                                                                                                                                                                                                                                                                                                                                                                                                                                                                                                                 | 844,341     |
| #1  | 'smoking':ti,ab,kw OR 'tobacco':ti,ab,kw OR 'tobacco use':ti,ab,kw OR 'tobacco use disorder':ti,ab,kw OR 'tobacco dependence':ti,ab,kw OR 'smoking dependence':ti,ab,kw OR 'cigarette':ti,ab,kw OR 'nicotine':ti,ab,kw OR 'nicotine dependence':ti,ab,kw                                                                                                                                                                                                                                                                                                                                                                                                                                                                                                                                                                                                                                                | 454,265     |

**eTable 4.** Web of Science Search Results

| Search | Query                                                                                                                                                                                                                                                                                                                                                                                                                                                                                                                                                                                                                                                                                                                                                                                                                                                                                                                                                                                                                                                                                                                                                                                                                                                                                                                                             | 12 Feb 2021 | 1 Mar 2022 |
|--------|---------------------------------------------------------------------------------------------------------------------------------------------------------------------------------------------------------------------------------------------------------------------------------------------------------------------------------------------------------------------------------------------------------------------------------------------------------------------------------------------------------------------------------------------------------------------------------------------------------------------------------------------------------------------------------------------------------------------------------------------------------------------------------------------------------------------------------------------------------------------------------------------------------------------------------------------------------------------------------------------------------------------------------------------------------------------------------------------------------------------------------------------------------------------------------------------------------------------------------------------------------------------------------------------------------------------------------------------------|-------------|------------|
| #5     | #1 AND #2 AND #3 AND #4                                                                                                                                                                                                                                                                                                                                                                                                                                                                                                                                                                                                                                                                                                                                                                                                                                                                                                                                                                                                                                                                                                                                                                                                                                                                                                                           | 238         | 731        |
| #4     | TI= ("epidemiologic studies" OR "epidemiologic study" OR "case control study" OR "case control studies" OR "case-control study" OR "cross-sectional studies" OR "cross-sectional study" OR "cross sectional stud" OR "cohort studies" OR "cohort study" OR "cohort analysis" OR "cohort study" OR "follow up study" OR "longitudinal study" OR "retrospective study" OR "prospective study" OR "observational study" OR "interrupted time series analysis OR "interrupted time series" OR "correlational" OR "descriptive study" OR "descriptive studies" OR "controlled before and after" OR "before and after study" OR "quasi-experimental" OR "quasi experimental") OR TS=("epidemiologic studies" OR "epidemiologic study" OR "case control study" OR "case control studies" OR "case-control study" OR "cross-sectional studies" OR "cross-sectional study" OR "cross sectional stud" OR "cohort studies" OR "cohort study" OR "cohort analysis" OR "cohort study" OR "follow up study" OR "longitudinal study" OR "retrospective study" OR "prospective study" OR "observational study" OR "interrupted time series analysis OR "interrupted time series" OR "correlational" OR "descriptive study" OR "descriptive studies" OR "controlled before and after" OR "before and after study" OR "quasi-experimental" OR "quasi experimental") | 332,885     | 455,709    |
| #3     | TI= ("policy" OR "policies" OR "intervention" OR "lobbies" OR "lobby" OR "influence" OR "public policy" OR "law" OR "strategy" OR "strategies" OR "initiatives" OR "regulation" OR "actions" OR "plan" OR "action plan" OR "campaigns" OR "campaign") OR TS= ("policy" OR "policies" OR "intervention" OR "lobbies" OR "lobby" OR "influence" OR "public policy" OR "law" OR "strategy" OR "strategies" OR "initiatives" OR "regulation" OR "actions" OR "plan" OR "action plan" OR "campaigns" OR "campaign")                                                                                                                                                                                                                                                                                                                                                                                                                                                                                                                                                                                                                                                                                                                                                                                                                                    | 8,386,130   | 14,864,078 |
| #2     | TI= ("taxation" OR "tax" OR "taxes" OR "taxed" OR "taxing" OR "excise" OR "cost" OR "price" OR "prices" OR "pricing" OR "promotion" OR "discount" OR "campaigns" OR "campaign" OR "ban" OR "partial ban" OR "full ban" OR "advertising" OR "advertisement" OR "tobacco control law" OR "smoke free law" OR "mass media" OR "pictorial warning" OR "health warning" OR "pictorial health warning" OR "graphic health warning" OR "graphic warning" OR "legal age") OR TS= ("taxation" OR "tax" OR "taxes" OR "taxed" OR "taxing" OR "excise" OR "cost" OR "price" OR "prices" OR "pricing" OR "promotion" OR "discount" OR "campaigns" OR "campaign" OR "ban" OR "partial ban" OR "full ban" OR "advertising" OR "advertisement" OR "tobacco control law" OR "smoke free                                                                                                                                                                                                                                                                                                                                                                                                                                                                                                                                                                           | 1,953,848   | 7,848,532  |

|    |                                                                                                                                                                                                                                                                                                                                                                  |         |           |
|----|------------------------------------------------------------------------------------------------------------------------------------------------------------------------------------------------------------------------------------------------------------------------------------------------------------------------------------------------------------------|---------|-----------|
|    | law” OR “mass media” OR “pictorial warning” OR “health warning” OR “pictorial health warning” OR “graphic health warning” OR “graphic warning” OR “legal age”)                                                                                                                                                                                                   |         |           |
| #1 | TI = (“smoking” OR “tobacco” OR “tobacco use” OR “tobacco use disorder” OR “tobacco dependence” OR “smoking dependence” OR “cigarette” OR “nicotine” OR “nicotine dependence”) OR TS = (“smoking” OR “tobacco” OR “tobacco use” OR “tobacco use disorder” OR “tobacco dependence” OR “smoking dependence” OR “cigarette” OR “nicotine” OR “nicotine dependence”) | 406,906 | 1,078,961 |

**eTable 5.** CINAHL Search Results

| Search | Query                                                                                                                                                                                                                                                                                                                                                                                                                                                                                                                                                                                                                                                                                                                                                                                                                                                                                                                                                                                                                                                                                                                                                                                                                                                                                                                                            | 12 Feb 2021 | 1 Mar 2022 |
|--------|--------------------------------------------------------------------------------------------------------------------------------------------------------------------------------------------------------------------------------------------------------------------------------------------------------------------------------------------------------------------------------------------------------------------------------------------------------------------------------------------------------------------------------------------------------------------------------------------------------------------------------------------------------------------------------------------------------------------------------------------------------------------------------------------------------------------------------------------------------------------------------------------------------------------------------------------------------------------------------------------------------------------------------------------------------------------------------------------------------------------------------------------------------------------------------------------------------------------------------------------------------------------------------------------------------------------------------------------------|-------------|------------|
| #S5    | #S1 AND #S2 AND #S3 AND #S4                                                                                                                                                                                                                                                                                                                                                                                                                                                                                                                                                                                                                                                                                                                                                                                                                                                                                                                                                                                                                                                                                                                                                                                                                                                                                                                      | 111         | 145        |
| #S4    | TI ("epidemiologic studies" OR "epidemiologic study" OR "case control study" OR "case control studies" OR "case-control study" OR "cross-sectional studies" OR "cross-sectional study" OR "cross sectional stud" OR "cohort studies" OR "cohort study" OR "cohort analysis" OR "cohort study" OR "follow up study" OR "longitudinal study" OR "retrospective study" OR "prospective study" OR "observational study" OR "interrupted time series analysis OR "interrupted time series" OR "correlational" OR "descriptive study" OR "descriptive studies" OR "controlled before and after" OR "before and after study" OR "quasi-experimental" OR "quasi experimental") OR AB ("epidemiologic studies" OR "epidemiologic study" OR "case control study" OR "case control studies" OR "case-control study" OR "cross-sectional studies" OR "cross-sectional study" OR "cross sectional stud" OR "cohort studies" OR "cohort study" OR "cohort analysis" OR "cohort study" OR "follow up study" OR "longitudinal study" OR "retrospective study" OR "prospective study" OR "observational study" OR "interrupted time series analysis OR "interrupted time series" OR "correlational" OR "descriptive study" OR "descriptive studies" OR "controlled before and after" OR "before and after study" OR "quasi-experimental" OR "quasi experimental") | 83,481      | 128,370    |
| #S3    | TI ("policy" OR "policies" OR "intervention" OR "lobbies" OR "lobby" OR "influence" OR "public policy" OR "law" OR "strategy" OR "strategies" OR "initiatives" OR "regulation" OR "actions" OR "plan" OR "action plan" OR "campaigns" OR "campaign") OR AB ("policy" OR "policies" OR "intervention" OR "lobbies" OR "lobby" OR "influence" OR "public policy" OR "law" OR "strategy" OR "strategies" OR "initiatives" OR "regulation" OR "actions" OR "plan" OR "action plan" OR "campaigns" OR "campaign")                                                                                                                                                                                                                                                                                                                                                                                                                                                                                                                                                                                                                                                                                                                                                                                                                                     | 110,649     | 1,020,980  |
| #S2    | TI ("taxation" OR "tax" OR "taxes" OR "taxed" OR "taxing" OR "excise" OR "cost" OR "price" OR "prices" OR "pricing" OR "promotion" OR "discount" OR "campaigns" OR "campaign" OR "ban" OR "partial ban" OR "full ban" OR "advertising" OR "advertisement" OR "tobacco control law" OR "smoke free law" OR "mass media" OR "pictorial warning" OR "health warning" OR "pictorial health warning" OR "graphic health warning" OR "graphic warning" OR "legal age") OR AB ("taxation" OR "tax" OR "taxes" OR "taxed" OR "taxing" OR "excise" OR "cost" OR "price" OR "prices" OR "pricing" OR "promotion" OR "discount" OR "campaigns" OR "campaign OR "ban" OR "partial ban" OR "full ban" OR "advertising" OR "advertisement" OR "tobacco control law" OR "smoke free law")                                                                                                                                                                                                                                                                                                                                                                                                                                                                                                                                                                       | 950,868     | 214,516    |

|     |                                                                                                                                                                                                                                                                                                                                                              |         |         |
|-----|--------------------------------------------------------------------------------------------------------------------------------------------------------------------------------------------------------------------------------------------------------------------------------------------------------------------------------------------------------------|---------|---------|
|     | OR “mass media” OR “pictorial warning” OR “health warning” OR “pictorial health warning” OR “graphic health warning” OR “graphic warning” OR “legal age”)                                                                                                                                                                                                    |         |         |
| #S1 | TI (“smoking” OR “tobacco” OR “tobacco use” OR “tobacco use disorder” OR “tobacco dependence” OR “smoking dependence” OR “cigarette” OR “nicotine” OR “nicotine dependence”) OR AB (“smoking” OR “tobacco” OR “tobacco use” OR “tobacco use disorder” OR “tobacco dependence” OR “smoking dependence” OR “cigarette” OR “nicotine” OR “nicotine dependence”) | 204,259 | 108,308 |



**eTable 6.** EconLit Search Results

| Search | Query                                                                                                                                                                                                                                                                                                                                                                                                                                                                                                               | 12 Feb 2021 | 1 Mar 2022 |
|--------|---------------------------------------------------------------------------------------------------------------------------------------------------------------------------------------------------------------------------------------------------------------------------------------------------------------------------------------------------------------------------------------------------------------------------------------------------------------------------------------------------------------------|-------------|------------|
| S4     | #S1 AND #S2 AND #S3                                                                                                                                                                                                                                                                                                                                                                                                                                                                                                 | 175         | 209        |
| S3     | TI = (“policy” OR “policies” OR “intervention” OR “lobbies” OR “lobby” OR “influence” OR “public policy” OR “law” OR “strategy” OR “strategies” OR “initiatives” OR “regulation” OR “actions” OR “plan” OR “action plan” OR “campaigns” OR “campaign”) OR AB= (“policy” OR “policies” OR “intervention” OR “lobbies” OR “lobby” OR “influence” OR “public policy” OR “law” OR “strategy” OR “strategies” OR “initiatives” OR “regulation” OR “actions” OR “plan” OR “action plan” OR “campaigns” OR “campaign”)     | 175,254     | 182,988    |
| S2     | TI = (“taxation” OR “tax” OR “taxes” OR “taxed” OR “taxing” OR “excise” OR “cost” OR “price” OR “prices” OR “pricing” OR “promotion” OR “discount” OR “campaigns” OR “campaign” OR “ban” OR “partial ban” OR “full ban” OR “advertising” OR “advertisement” OR “tobacco control law” OR “smoke free law” OR “mass media” OR “pictorial warning” OR “health warning” OR “pictorial health warning” OR “graphic health warning” OR “graphic warning” OR “legal age”) OR AB = (“taxation” OR “tax” OR “taxes” OR “ ... | 329,530     | 347,928    |
| S1     | TI = (“smoking” OR “tobacco” OR “tobacco use” OR “tobacco use disorder” OR “tobacco dependence” OR “smoking dependence” OR “cigarette” OR “nicotine” OR “nicotine dependence” OR) OR AB = (“smoking” OR “tobacco” OR “tobacco use” OR “tobacco use disorder” OR “tobacco dependence” OR “smoking dependence” OR “cigarette” OR “nicotine” OR “nicotine dependence”)                                                                                                                                                 | 2,986       | 3,242      |

**eAppendix 1. Data Extraction Form**

**Section 1: General and background information**

|                                                                                                                                       |  |
|---------------------------------------------------------------------------------------------------------------------------------------|--|
| Article ID                                                                                                                            |  |
| Data extractor                                                                                                                        |  |
| Article title                                                                                                                         |  |
| Author names (Last name et al)                                                                                                        |  |
| Year of publication                                                                                                                   |  |
| Country                                                                                                                               |  |
| Place<br><i>(National/Urban/Rural/others)</i>                                                                                         |  |
| Region                                                                                                                                |  |
| Study subjects<br><i>(Adult/Elderly/children/All)</i>                                                                                 |  |
| Gender<br><i>(Both/Male/Female)</i>                                                                                                   |  |
| Age of the participants (Years)                                                                                                       |  |
| Mean or median age of participants                                                                                                    |  |
| Study design<br><i>(Cross-section, cohort, case-control, longitudinal, control before and after, interrupted time series, others)</i> |  |
| Survey start                                                                                                                          |  |
| Survey end                                                                                                                            |  |
| Sample size                                                                                                                           |  |
| Sampling methods                                                                                                                      |  |
| Please specify covariates adjusted in analysis                                                                                        |  |

**Section 2: Please provide policy name /interventions with brief description or definition in the following tables.**

| No. | Name of policy | Implementation date | Description/Definition | Description of comparator |
|-----|----------------|---------------------|------------------------|---------------------------|
| 1   |                |                     |                        |                           |
| 2   |                |                     |                        |                           |
| 3   |                |                     |                        |                           |
| 4   |                |                     |                        |                           |
| 5   |                |                     |                        |                           |
| 6   |                |                     |                        |                           |
| 7   |                |                     |                        |                           |
| 8   |                |                     |                        |                           |

**Section 3: Please provide outcomes name with brief description or definition in the following tables.**

| No. | Outcomes | Description/Definition |
|-----|----------|------------------------|
| 1   |          |                        |
| 2   |          |                        |
| 3   |          |                        |
| 4   |          |                        |
| 5   |          |                        |
| 6   |          |                        |
| 7   |          |                        |
| 8   |          |                        |

**Section 4: Effect size by outcome and policy**

| Name of policy         | Name of outcome        | Name of effect size (OR/RR/HR/ coefficient/others) <sup>a</sup> | Please report values of OR/RR/coefficient | Please report SE, or 95% CI |
|------------------------|------------------------|-----------------------------------------------------------------|-------------------------------------------|-----------------------------|
| Smoke-free legislation | Cardiovascular disease | Hazard ratio                                                    | 0.58                                      | 0.33-0.99                   |
|                        |                        |                                                                 |                                           |                             |
|                        |                        |                                                                 |                                           |                             |
|                        |                        |                                                                 |                                           |                             |
|                        |                        |                                                                 |                                           |                             |
|                        |                        |                                                                 |                                           |                             |
|                        |                        |                                                                 |                                           |                             |
|                        |                        |                                                                 |                                           |                             |
|                        |                        |                                                                 |                                           |                             |

Note: the effects size should be fill by policy and outcome. One example is provided for smoke-free legislation by outcome. Please use extra rows or drop rows if required

Name of effect size: odds ratio (OR), risk ratio (RR), hazard ratio (HR), coefficients, percentage change, mean difference, rate of changes.

**Section 5: Please report briefly on each item in the following table**

|                        | Author reported |
|------------------------|-----------------|
| Objectives             |                 |
| Participants selection |                 |
| Statistical methods    |                 |
| Unit of analysis       |                 |
| Results                |                 |
| Conclusion             |                 |

## eAppendix 2. Study Quality Assessment

**Observational studies:** We employed a specific checklist to assess the methodological quality of all included cohort studies using the Newcastle–Ottawa Scale (NOS) recommended by Wells and colleagues<sup>1</sup>. This system is based on a system of stars (\*) awarded for each applicable criterion. Three major domain-based approaches were used for evaluating the observational study quality: selection, comparability, and outcome.

**Cohort Study:** The cohort studies used nine criteria: the representativeness of the exposed cohort, the selection of the non-exposed cohort, ascertainment of exposure, outcome of interest not present at start (maximum of four stars); comparability of the cohorts based on study design and analysis (maximum of two stars); and finally, the assessment of the outcome (maximum of three stars). All studies received a score based on these nine criteria, ranging from 0 to 9. Studies were defined as high quality, score  $\geq 6$ ; moderate quality, score 4-5; or low quality, score 0-3.

|             | Selection                           |                                                  |                           |                                          | Comparability                      |                                       | Outcome                       |                                             |                                 | Total Score |
|-------------|-------------------------------------|--------------------------------------------------|---------------------------|------------------------------------------|------------------------------------|---------------------------------------|-------------------------------|---------------------------------------------|---------------------------------|-------------|
|             | 1                                   | 2                                                | 3                         | 4                                        | 5A                                 | 5B                                    | 6                             | 7                                           | 8                               |             |
| Study, year | Exposed cohort truly representative | Non-exposed cohort drawn from the same community | Ascertainment of exposure | Outcome of interest not present at start | Cohorts comparable on basis of age | Cohorts comparable on other factor(s) | Quality of outcome assessment | Follow-up long enough for outcomes to occur | Complete accounting for cohorts |             |

**Cross-sectional study:** The cross-sectional studies used 10 criteria: the representativeness of the sample, sample size determination, non-response, ascertainment of exposure (maximum of five stars); comparability of the study on the basis of study design and analysis (maximum of two stars); and finally, the assessment of the outcome (maximum of three stars). All studies received a score on the basis of these nine criteria, ranging from 0 to 10. Studies were defined as high quality, score  $\geq 6$ ; moderate quality, score 4-5; or low quality, score 0-3.

|             | Selection (5 points)                 |                 |                     |                                    | Comparability (2 points) |                                       | Outcome (3 points)             |                      | Total Score |
|-------------|--------------------------------------|-----------------|---------------------|------------------------------------|--------------------------|---------------------------------------|--------------------------------|----------------------|-------------|
|             | 1                                    | 2               | 3                   | 4                                  | 5A                       | 5B                                    | 6                              | 7                    |             |
| Study, year | Representativeness of the sample (*) | Sample size (*) | Non-respondents (*) | Ascertainment of the exposure (**) | Controls for age (*)     | Control for any additional factor (*) | Assessment of the outcome (**) | Statistical test (*) |             |

**Case-control study:** The case-control studies used 9 criteria: definition of case, representativeness of the case, selection of controls, definition of controls (maximum 4 stars); controls for age, controls for any additional factors (maximum of two stars); ascertainment of exposure, ascertainment of case and controls (maximum of two stars). All studies received a score on the basis of these nine criteria, ranging from 0 to 10. Studies were defined as high quality, score  $\geq 6$ ; moderate quality, score 4-5; or low quality, score 0-3.

| Study, year | Selection (4 points)   |                                    |                           |                            | Comparability (2 points) |                                       | Exposure (3 points)           |                                        | Total Score |
|-------------|------------------------|------------------------------------|---------------------------|----------------------------|--------------------------|---------------------------------------|-------------------------------|----------------------------------------|-------------|
|             | 1                      | 2                                  | 3                         | 4                          | 5A                       | 5B                                    | 6                             | 7                                      |             |
|             | Definition of case (*) | Representativeness of the case (*) | Selection of controls (*) | Definition of controls (*) | Controls for age (*)     | Control for any additional factor (*) | Ascertainment of exposure (*) | Ascertainment of case and controls (*) |             |

**Experimental/quasi-experimental studies:** Cochrane EPOC tools were used for assessing the risk of bias for quasi-experimental studies **such as** controlled before and after, and interrupted time series <sup>2</sup>. Risk of bias was evaluated through the following items: confounding bias, detection bias (only in non-experimental studies- two domains), selection bias, attrition bias, reporting bias, other bias.

(1) Confounding bias: Comparability of groups for quasi-experimental studies. **Such as**, was the policy independent of other changes?

(2) Detection bias: Was the shape of the policy effect pre-specified? Was the policy unlikely to affect data collection?

(3) Selection bias: Sample representativeness.

(4) Attrition bias: Describe the completeness of outcome data for each main outcome, including attrition and exclusions from the analysis. - Reporting bias: State how the possibility of selective outcome reporting was examined by the review authors, and what was found.

(5) Other bias: State any important concerns about bias not addressed in the other domains in the tool.

| Study, year | Confounding bias | Detection Bias1 | Detection Bias2 | Selection Bias | Attrition Bias | Reporting Bias | Other Bias | Total Score |
|-------------|------------------|-----------------|-----------------|----------------|----------------|----------------|------------|-------------|
|-------------|------------------|-----------------|-----------------|----------------|----------------|----------------|------------|-------------|

We rated the overall methodological quality of the included studies as being at low, moderate, or high risk of bias. For non-experimental studies without control group, seven domains of bias were used. Articles with 5 or more subcategories of low bias are classified as “Low” in the summary risk of bias; articles with low bias subcategories between 3 and 4 are classified as “Moderate”; and those with subcategories between 1 and 2 classified as “High”. For quasi-experimental studies with control group, five domains of bias were used. Articles with 4 or more subcategories with low bias are classified as “Low” in the summary risk of bias; the ones with 3 subcategories classified as “Moderate”; and those with subcategories between 1 and 2 classified as “High”.

For comparison with observational studies and to make a unique score, we change subcategory name from “High risk of bias” to “low quality study”; “Moderate risk of bias” to “moderate quality study”, and “Low risk of bias” to “high-quality study”. **NB:** Two reviewers independently assessed the study quality, which was then cross-checked by two other authors. Disagreements were resolved through discussion.

**eFigure 1.** Study Selection Flowchart

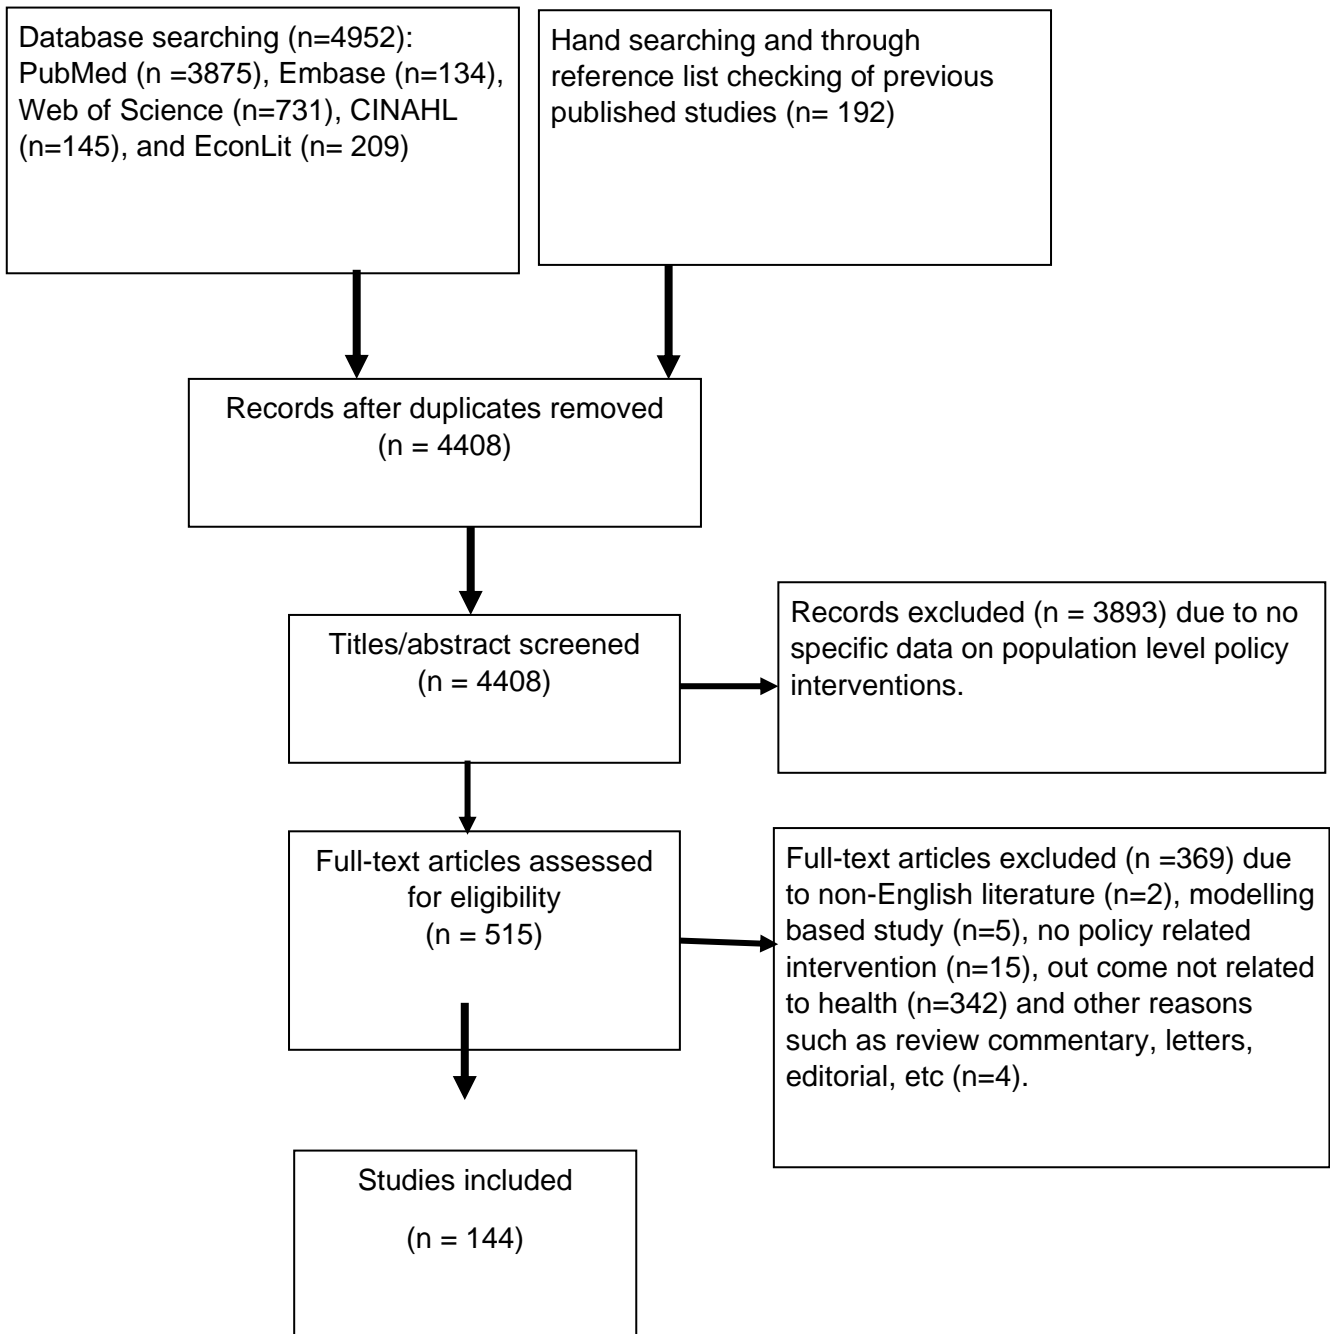

**eTable 7.** Study Characteristics

| Study (publication year)                 | Study design (location) <sup>1</sup> | Participant (age, years) <sup>2</sup> | Policy start date | Name of policy <sup>3</sup>            | Outcome <sup>4</sup>                                         | Study quality |
|------------------------------------------|--------------------------------------|---------------------------------------|-------------------|----------------------------------------|--------------------------------------------------------------|---------------|
| Abe et al. (2016) <sup>3</sup>           | ITS (Brazil)                         | NA (NA)                               | 2009              | Smoke-free legislation                 | AMI — mortality rate, hospitalization rate                   | Moderate      |
| Abreu et al. (2017) <sup>4</sup>         | ITS (Portugal)                       | All (≥0)                              | 2008              | Smoke-free legislation                 | Acute coronary syndrome — hospitalization rate               | Moderate      |
| Adams et al. (2013) <sup>5</sup>         | Cross-sectional(USA)                 | Female (<20 - ≥ 40)                   | 1998              | Smoking cessation service (enrollment) | Birth outcomes                                               | Moderate      |
| Aguero et al. (2013) <sup>6</sup>        | ITS (Spain)                          | All (25-74)                           | 2006              | Smoke-free legislation                 | AMI — case fatality rate, mortality rate, incidence rate     | Moderate      |
| Allwright et al. (2005) <sup>7</sup>     | CBA (Ireland)                        | All (20.9-54.9)                       | 2004              | Smoke-free legislation                 | Respiratory symptoms, sensory symptoms — prevalence          | High          |
| Alsever et al. (2009) <sup>8</sup>       | CBA (USA)                            | All (NA)                              | 2003              | Smoke-free legislation                 | AMI — hospitalization rate                                   | High          |
| Amaral (2009) <sup>9</sup>               | Cross-sectional (USA)                | All (39.55 gestational weeks)         | 1995              | Smoke-free legislation                 | Birth outcomes                                               | High          |
| Ayres et al. (2009) <sup>10</sup>        | Longitudinal (Scotland)              | All (≥15)                             | 2006              | Smoke-free legislation                 | Respiratory symptoms, sensory symptoms — prevalence          | Moderate      |
| Bakolis et al. (2016) <sup>11</sup>      | ITS (UK)                             | All (24-44 gestational weeks)         | 2007              | Smoke-free legislation                 | Birth outcomes                                               | Moderate      |
| Bannon et al. (2009) <sup>12</sup>       | Cross-sectional (Ireland)            | All (≥16)                             | 2007              | Smoke-free legislation                 | Respiratory symptoms, sensory symptoms — prevalence          | Moderate      |
| Barnett et al. (2009) <sup>13</sup>      | ITS (New Zealand)                    | All (≥30)                             | 2003              | Smoke-free legislation                 | AMI — hospitalization rate                                   | Moderate      |
| Barnoya & Glantz. (2004) <sup>14</sup>   | ITS (USA)                            | NA (NA)                               | 1998              | Tobacco control program                | Lung cancer, bladder cancer — incidence rate                 | Moderate      |
| Barone-Adesi et al. (2006) <sup>15</sup> | ITS (Italy)                          | All (≥0)                              | 2005              | Smoke-free legislation                 | Acute coronary events, AMI — hospitalization rate            | Moderate      |
| Barone-Adesi et al. (2011) <sup>16</sup> | ITS (Italy)                          | All (≥0)                              | 2005              | Smoke-free legislation                 | Ischemic heart disease — hospitalization rate                | Moderate      |
| Barr et al. (2012) <sup>17</sup>         | Cohort (USA)                         | All (≥ 65)                            | 1999              | Smoke-free legislation                 | AMI — hospitalization rate                                   | High          |
| Barrio et al. (2019) <sup>18</sup>       | Longitudinal (Spain)                 | All (≥25)                             | 2006              | Smoke-free legislation                 | Coronary heart disease, respiratory disease — mortality rate | High          |
| Bartecchi et al. (2006) <sup>19</sup>    | CBA (USA)                            | All (50.6-83.1)                       | 2003              | Smoke-free legislation                 | AMI — hospitalization rate                                   | High          |



|                                              |                          |                                                    |            |                        |                                                                    |          |
|----------------------------------------------|--------------------------|----------------------------------------------------|------------|------------------------|--------------------------------------------------------------------|----------|
| Bartholomew & Abouk (2016) <sup>20</sup>     | Cross-sectional (USA)    | Female (<18 - 21+); Both (38.78 gestational weeks) | 1992       | Smoke-free legislation | Birth outcomes                                                     | High     |
| Basel et al. (2014) <sup>21</sup>            | CBA (USA)                | All (52.5-81.3)                                    | 2006       | Smoke-free legislation | AMI — hospitalization rate                                         | Low      |
| Been et al. (a) (2015) <sup>22</sup>         | ITS (UK)                 | All (0-14)                                         | 2007       | Smoke-free legislation | Acute respiratory tract infections — hospitalization rate          | High     |
| Been et al. (b) (2015) <sup>23</sup>         | ITS (UK)                 | All (0-12)                                         | 2006-2007  | Smoke-free legislation | Respiratory disease — incidence rate                               | High     |
| Been et al. (c) (2015) <sup>24</sup>         | ITS (UK)                 | All ( $\leq$ 1)                                    | 2007       | Smoke-free legislation | Early life outcomes                                                | Moderate |
| Bharadwaj et al. (2014) <sup>25</sup>        | Cross-sectional (Norway) | All (8-12 gestational weeks)                       | 2004       | Smoke-free legislation | Birth outcomes                                                     | High     |
| Bianchi et al. (2011) <sup>26</sup>          | Cross-sectional (Italy)  | All (0-14)                                         | 2005       | Smoke-free legislation | Asthma — hospitalization rate                                      | Low      |
| Bonetti et al. (2011) <sup>27</sup>          | CBA (Switzerland)        | NA (NA)                                            | 2008       | Smoke-free legislation | AMI — hospitalization rate                                         | Moderate |
| Bowser et al. (2016) <sup>28</sup>           | Longitudinal (USA)       | All ( $\geq$ 0)                                    | 1970-2005  | Tobacco tax            | Mortality rate                                                     | Moderate |
| Bruinjtjes et al. (2011) <sup>29</sup>       | Cross-sectional (USA)    | All (65-69)                                        | 2003       | Smoke-free legislation | AMI — hospitalization rate                                         | High     |
| Carrión-Valero et al. (2020) <sup>30</sup>   | Cross-sectional (Spain)  | All ( $\geq$ 40)                                   | 2005, 2010 | Smoke-free legislation | AMI — hospitalization rate                                         | High     |
| Carrión-Valero et al. (2020) <sup>31</sup>   | Cohort (Spain)           | All ( $\geq$ 20)                                   | 2005, 2010 | Smoke-free legislation | Cardiovascular, respiratory, cancer disease — hospitalization rate | Low      |
| Cesaroni et al. (2008) <sup>32</sup>         | ITS (Italy)              | All (35-84)                                        | 2005       | Smoke-free legislation | Acute coronary events — hospitalization, mortality rate            | Moderate |
| Ciaccio et al. (2016) <sup>33</sup>          | ITS (USA)                | All (<18)                                          | 2003       | Smoke-free legislation | Asthma — emergency visits rate                                     | High     |
| Cox et al. (2014) <sup>34</sup>              | ITS (Belgium)            | All ( $\geq$ 30)                                   | 2006, 2007 | Smoke-free legislation | AMI — mortality rate                                               | Moderate |
| Croghan et al. (2015) <sup>35</sup>          | Cohort (USA)             | All ( $\geq$ 0)                                    | 2007       | Smoke-free legislation | COPD, asthma — emergency visits rate                               | High     |
| Cronin et al. (2012) <sup>36</sup>           | Longitudinal (Ireland)   | All ( $\geq$ 18)                                   | 2004       | Smoke-free legislation | Acute coronary syndromes — hospitalization rate                    | Moderate |
| de Korte-de Boer et al. (2012) <sup>37</sup> | ITS (Netherlands)        | All (20-75)                                        | 2004       | Smoke-free legislation | Sudden circulatory arrest — incidence rate                         | Moderate |

|                                          |                       |                       |            |                         |                                                                                                                                                           |          |
|------------------------------------------|-----------------------|-----------------------|------------|-------------------------|-----------------------------------------------------------------------------------------------------------------------------------------------------------|----------|
| Dilley et al. (2012) <sup>38</sup>       | ITS (USA)             | NA (NA)               | 2000, 2005 | Tobacco control program | Ischemic heart disease, cerebrovascular disease, chronic respiratory disease, esophageal cancer, larynx cancer, oral cancer, lung cancer — incidence rate | Low      |
| Di Valentino et al. (2014) <sup>39</sup> | CBA (Switzerland)     | All ( $\geq 0$ )      | 2007       | Smoke-free legislation  | ST-elevation myocardial infarction (STEMI) — hospitalization rate                                                                                         | High     |
| Dove et al. (2010) <sup>40</sup>         | Cross-sectional (USA) | All ( $\geq 35$ )     | 2004       | Smoke-free legislation  | AMI — mortality rate                                                                                                                                      | High     |
| Dove et al. (2011) <sup>41</sup>         | ITS (USA)             | All (3-15)            | NA         | Smoke-free legislation  | Asthma — prevalence                                                                                                                                       | Low      |
| Durham et al. (2011) <sup>42</sup>       | Cohort (Switzerland)  | NA (NA)               | 2009       | Smoke-free legislation  | Respiratory symptoms — prevalence                                                                                                                         | Low      |
| Eagan et al. (2006) <sup>43</sup>        | Cohort (Norway)       | All ( $\geq 15$ )     | 2004       | Smoke-free legislation  | Respiratory symptoms — prevalence                                                                                                                         | Low      |
| Eisner et al. (1998) <sup>44</sup>       | Cohort (USA)          | NA (NA)               | 1998       | Smoke-free legislation  | Respiratory symptoms — prevalence                                                                                                                         | Moderate |
| Evans & Ringel (1999) <sup>45</sup>      | Cross-sectional (USA) | Female (15-44)        | 1982       | Tobacco tax             | Birth outcomes                                                                                                                                            | High     |
| Farrelly (2005) <sup>46</sup>            | Cohort (USA)          | All ( $\geq 18$ )     | 2003       | Smoke-free legislation  | Respiratory symptoms, sensory symptoms — prevalence                                                                                                       | Moderate |
| Fernandez (2009) <sup>47</sup>           | Cohort (Spain)        | Female (30.9-48.8)    | 2006       | Smoke-free legislation  | Respiratory symptoms — prevalence                                                                                                                         | High     |
| Ferrante et al. (2011) <sup>48</sup>     | ITS (Argentina)       | NA (NA)               | 2006       | Smoke-free legislation  | Acute coronary syndrome, AMI — hospitalization rate                                                                                                       | Low      |
| Fichtenberg et al. (2000) <sup>49</sup>  | Cross-sectional (USA) | All ( $\geq 25$ )     | 1989       | Tobacco control program | Heart disease — mortality rate                                                                                                                            | High     |
| Galán et al. (2015) <sup>50</sup>        | ITS (Spain)           | All ( $\geq 18$ )     | 2006       | Smoke-free legislation  | AMI, cerebrovascular disease, COPD, asthma — hospitalization rate                                                                                         | High     |
| Galán et al. (2017) <sup>51</sup>        | ITS (Spain)           | All (<15- $\geq 65$ ) | 2006       | Smoke-free legislation  | Chronic respiratory diseases — hospitalization rate                                                                                                       | High     |
| Galán et al. (2018) <sup>52</sup>        | ITS (Spain)           | All ( $\geq 18$ )     | 2006, 2011 | Smoke-free legislation  | AMI, ischemic heart disease, cerebrovascular disease — hospitalization rate                                                                               | Low      |
| Gao & Baughman (2017) <sup>53</sup>      | ITS (USA)             | Female (14-45)        | 1995       | Smoke-free legislation  | Birth outcomes                                                                                                                                            | Moderate |

|                                            |                           |                   |           |                                     |                                                                                                         |          |
|--------------------------------------------|---------------------------|-------------------|-----------|-------------------------------------|---------------------------------------------------------------------------------------------------------|----------|
| Gasparri et al. (2009) <sup>54</sup>       | ITS (Italy)               | All (30-64)       | 2005      | Smoke-free legislation              | AMI — incidence rate                                                                                    | High     |
| Gaudreau et al. (2013) <sup>55</sup>       | ITS (Canada)              | All (0-104)       | 2003      | Smoke-free legislation              | AMI, angina, stroke, COPD, appendicitis, pancreatitis, bowel obstruction, asthma — hospitalization rate | High     |
| Goodman et al. (2007) <sup>56</sup>        | CBA (Ireland)             | Male (6-52)       | 2004      | Smoke-free legislation              | Respiratory symptoms, sensory symptoms — prevalence                                                     | Low      |
| Gupta et al. (2011) <sup>57</sup>          | ITS (USA)                 | All ( $\geq 18$ ) | 2004      | Smoke-free legislation              | Acute coronary syndrome — hospitalization rate                                                          | High     |
| Hahn et al. (2011) <sup>58</sup>           | ITS (USA)                 | All ( $\geq 35$ ) | 2004      | Smoke-free legislation              | AMI — hospitalization rate                                                                              | High     |
| Hajdu & Hajdu (2018) <sup>59</sup>         | Cross-sectional (Hungary) | Female (NA)       | 2012      | Smoke-free legislation              | Pregnancy outcomes — prevalence                                                                         | High     |
| Hankins & Tarasenko (2016) <sup>60</sup>   | ITS (USA)                 | Female (NA)       | 1991-2009 | Smoke-free legislation              | Neonatal outcomes — prevalence                                                                          | High     |
| Hatoun et al. (2018) <sup>61</sup>         | Cross-sectional (USA)     | All (6-19)        | 2006      | Tobacco tax                         | Asthma severity                                                                                         | High     |
| Hawkins et al. (2014) <sup>62</sup>        | ITS (USA)                 | Female (18-50)    | 2000-2010 | Smoke-free legislation, Tobacco tax | Birth outcomes                                                                                          | High     |
| Hawkins et al. (2016) <sup>63</sup>        | ITS (USA)                 | All (0-17)        | 2006      | Smoke-free legislation              | Asthma, ear infections, respiratory infections — emergency visits rate                                  | High     |
| Hawkins & Baum et al. (2019) <sup>64</sup> | ITS (USA)                 | Female (16-49)    | 2005-2015 | Smoke-free legislation, Tobacco tax | Birth outcomes                                                                                          | High     |
| Hawkins & Baum et al. (2019) <sup>65</sup> | ITS (USA)                 | Female (16-49)    | 2005-2015 | Smoke-free legislation, Tobacco tax | Birth defects                                                                                           | High     |
| Head et al. (2012) <sup>66</sup>           | CBA (USA)                 | All (NA)          | 2006      | Smoke-free legislation              | AMI, stroke or cerebrovascular accident, transient ischemic attack, COPD, asthma — discharge rate       | High     |
| Herman & Walsh (2011) <sup>67</sup>        | CBA (USA)                 | NA (NA)           | 2007      | Smoke-free legislation              | AMI, unstable angina, acute stroke, acute asthma — hospitalization rate                                 | Moderate |
| Ho et al. (2017) <sup>68</sup>             | CBA (USA)                 | All ( $\geq 18$ ) | 2001-2008 | Smoke-free legislation, Tobacco tax | AMI, congestive heart failure, pneumonia — hospitalization rate                                         | High     |

|                                       |                               |                               |           |                                                                                     |                                                                                                                                                                                                                             |          |
|---------------------------------------|-------------------------------|-------------------------------|-----------|-------------------------------------------------------------------------------------|-----------------------------------------------------------------------------------------------------------------------------------------------------------------------------------------------------------------------------|----------|
| Holford et al. (2014) <sup>69</sup>   | ITS (USA)                     | All (0-65)                    | 1964      | Tobacco control program                                                             | Mortality rate (smoking-attributable)                                                                                                                                                                                       | Moderate |
| Hone et al. (2020) <sup>70</sup>      | CBA (Brazil)                  | All (0-1)                     | 2014      | Smoke-free legislation                                                              | Infant and Neonatal mortality rate                                                                                                                                                                                          | Moderate |
| Humair et al. (2014) <sup>71</sup>    | Cross-sectional (Switzerland) | All ( $\geq 16$ )             | 2009      | Smoke-free legislation                                                              | Acute COPD, pneumonia, acute asthma, acute coronary syndrome, ischemic stroke — hospitalization rate                                                                                                                        | High     |
| Hurt et al. (2012) <sup>72</sup>      | ITS (USA)                     | All (42-82)                   | 2007      | Smoke-free legislation                                                              | Myocardial infarction, sudden cardiac death — incidence rate                                                                                                                                                                | High     |
| Jan et al. (2014) <sup>73</sup>       | ITS (Panama)                  | All (30-98)                   | 2008      | Smoke-free legislation, Tobacco tax                                                 | AMI — hospitalization rate                                                                                                                                                                                                  | High     |
| Jarlenski et al. (2014) <sup>74</sup> | Cohort (USA)                  | Female (19-44)                | 2004-2010 | Smoking cessation service (enrollment)                                              | Birth outcomes                                                                                                                                                                                                              | Low      |
| Jiang et al. (2019) <sup>75</sup>     | ITS (Australia)               | All ( $\geq 15$ )             | 1960-1987 | Reports/Media campaign on dangers of tobacco, Cigarette-, Tobacco-advertisement ban | All cancers, lung cancer — mortality rate                                                                                                                                                                                   | High     |
| Johnson & Beal (2012) <sup>76</sup>   | Cross-sectional (USA)         | All (28-70)                   | 2010      | Smoke-free legislation                                                              | Heart attack — hospitalization rate, mortality rate                                                                                                                                                                         | High     |
| Juster et al. (2007) <sup>77</sup>    | ITS (USA)                     | All ( $\geq 35$ )             | 2003      | Smoke-free legislation                                                              | AMI — hospitalization rate                                                                                                                                                                                                  | High     |
| Kabir et al. (2009) <sup>78</sup>     | Cross-sectional (Ireland)     | Female (<20 - >34)            | 2004      | Smoke-free legislation                                                              | Birth outcomes                                                                                                                                                                                                              | High     |
| Kabir et al. (2013) <sup>79</sup>     | Cross-sectional (Ireland)     | All (24-41 gestational weeks) | 2004      | Smoke-free legislation                                                              | Birth outcomes                                                                                                                                                                                                              | High     |
| Kalkhoran et al. (2014) <sup>80</sup> | ITS (Uruguay)                 | All ( $\geq 15$ )             | 2006      | Smoke-free legislation                                                              | Bronchospasm — hospitalization rate, bronchospasm — emergency visits rate                                                                                                                                                   | High     |
| Kent et al. (2012) <sup>81</sup>      | Cross-sectional (Ireland)     | All (20-70)                   | 2004      | Smoke-free legislation                                                              | Pulmonary disease, COPD, asthma, pneumonia, lower respiratory tract infection, spontaneous pneumothorax, acute coronary syndrome, myocardial infarction, unstable angina, cerebrovascular syndromes, stroke/cerebrovascular | High     |

|                                       |                                     |                               |            |                          |                                                                             |          |
|---------------------------------------|-------------------------------------|-------------------------------|------------|--------------------------|-----------------------------------------------------------------------------|----------|
|                                       |                                     |                               |            |                          | accident, transient ischemic attack — hospitalization rate                  |          |
| Khuder et al. (2007) <sup>82</sup>    | CBA (USA)                           | All (≥18)                     | 2002       | Smoke-free legislation   | Coronary heart disease — hospitalization rate                               | High     |
| Kim et al. (2015) <sup>83</sup>       | Longitudinal (Korea)                | All (35-50)                   | 2013       | Smoke-free legislation   | Respiratory symptoms, sensory symptoms — prevalence                         | Moderate |
| Kong et al. (2021) <sup>84</sup>      | Cross-sectional (USA)               | Male (≥45)                    | NA         | Tobacco retailer density | COPD — discharge rate                                                       | High     |
| Landers (2014) <sup>85</sup>          | CBA (USA)                           | All (NA)                      | 2003-2008  | Smoke-free legislation   | Asthma — discharge rate                                                     | Moderate |
| Larsson et al. (2008) <sup>86</sup>   | Longitudinal (Sweden)               | All (18-65)                   | 2005       | Smoke-free legislation   | Respiratory symptoms — prevalence                                           | High     |
| Lee et al. (2016) <sup>87</sup>       | CBA (China)                         | All (≤18)                     | 2007       | Smoke-free legislation   | Lower respiratory tract infection — hospitalization rate                    | High     |
| Lemstra et al. (2008) <sup>88</sup>   | CBA (Canada)                        | All (65-72)                   | 2004       | Smoke-free legislation   | AMI — incidence rate                                                        | High     |
| Li e t al. (2013) <sup>89</sup>       | Longitudinal (China)                | All (16-65)                   | 2010       | Smoke-free legislation   | Respiratory symptoms, sensory symptoms — prevalence                         | Moderate |
| Lippert & Gustat (2012) <sup>90</sup> | Cross-sectional (USA)               | All (≥18)                     | 2008       | Smoke-free legislation   | Coronary heart disease, angina, AMI — prevalence                            | High     |
| Liu et al. (2013) <sup>91</sup>       | ITS (UK)                            | All (≥18)                     | 2007       | Smoke-free legislation   | Coronary heart disease, myocardial infarction — hospitalization rate        | High     |
| Loomis et al. (2012) <sup>92</sup>    | ITS (USA)                           | All (≥35)                     | 2003       | Smoke-free legislation   | AMI, stroke — hospitalization rate                                          | High     |
| Ma ZQ et al. (2013) <sup>93</sup>     | ITS (USA)                           | All (18 - ≥40)                | 2002-2004  | Tobacco tax              | AMI, asthma — hospitalization rate<br>sudden cardiac death — mortality rate | High     |
| MacCalman et al. (2012) <sup>94</sup> | Longitudinal (England and Scotland) | All (≥18)                     | 2006, 2007 | Smoke-free legislation   | Respiratory symptoms, sensory symptoms — prevalence                         | Moderate |
| Mackay et al. (2010) <sup>95</sup>    | Cross-sectional (Scotland)          | All (< 15)                    | 2006       | Smoke-free legislation   | Asthma — hospitalization rate                                               | High     |
| Mackay et al. (2012) <sup>96</sup>    | Cohort (Scotland)                   | All (24-44 gestational weeks) | 2006       | Smoke-free legislation   | Pregnancy complications — prevalence                                        | High     |
| Mackay et al. (2013) <sup>97</sup>    | ITS (Scotland)                      | All (≥18)                     | 2006       | Smoke-free legislation   | Cerebral infarction, stroke — incidence rate                                | High     |
| Madureira et al. (2013) <sup>98</sup> | Longitudinal (Portugal)             | All (≥18)                     | 2008       | Smoke-free legislation   | Respiratory symptoms, sensory symptoms — prevalence                         | Moderate |

|                                           |                    |                               |      |                                         |                                                                                                                                        |          |
|-------------------------------------------|--------------------|-------------------------------|------|-----------------------------------------|----------------------------------------------------------------------------------------------------------------------------------------|----------|
| Mallma et al. (2020) <sup>99</sup>        | ITS (USA)          | All ( $\leq 0$ )              | 2008 | Tobacco control program                 | Birth outcomes                                                                                                                         | High     |
| Markowitz (2008) <sup>100</sup>           | ITS (USA)          | All ( $< 1$ )                 | 2003 | Smoke-free legislation, Cigarette price | Sudden infant death syndrome — incidence rate                                                                                          | Moderate |
| Markowitz (2013) <sup>101</sup>           | CBA (USA)          | All ( $\leq 1$ )              | 1998 | Smoke-free legislation, Cigarette tax   | Birth outcomes                                                                                                                         | High     |
| Mayne et al. (2018) <sup>102</sup>        | Longitudinal (USA) | All (18-30)                   | 1998 | Smoke-free legislation                  | Cardiovascular disease — incidence rate                                                                                                | High     |
| Mayne et al. (2018) <sup>103</sup>        | Longitudinal (USA) | All (33-45)                   | NA   | Smoke-free legislation                  | Hypertension — incidence rate                                                                                                          | High     |
| McAlister et al. (2010) <sup>104</sup>    | CBA (USA)          | NA (NA)                       | 2000 | Tobacco control program                 | AMI — mortality rate                                                                                                                   | Moderate |
| McGhee et al. (2014) <sup>105</sup>       | ITS (Hong-Kong)    | All (0-65)                    | 2006 | Smoke-free legislation                  | Ischemic heart disease, AMI, cerebrovascular, cardiovascular, respiratory outcomes, lung cancer — hospitalization rate, mortality rate | High     |
| McKinnon et al. (2015) <sup>106</sup>     | CBA (Canada)       | All (22-44 gestational weeks) | 2006 | Smoke-free legislation                  | Birth outcomes                                                                                                                         | High     |
| Menzies et al. (2006) <sup>107</sup>      | ITS (Scotland)     | Male (22-48)                  | 2006 | Smoke-free legislation                  | Respiratory symptoms, sensory symptoms — prevalence                                                                                    | Moderate |
| Millett et al. (2013) <sup>108</sup>      | ITS (England)      | All ( $\leq 14$ )             | 2007 | Smoke-free legislation                  | Asthma — hospitalization rate                                                                                                          | Moderate |
| Moraros et al. (2010) <sup>109</sup>      | ITS (USA)          | All ( $\geq 18$ )             | 2002 | Smoke-free legislation                  | AMI, Asthma — incidence rate                                                                                                           | Moderate |
| Naiman et al. (2010) <sup>110</sup>       | CBA (Canada)       | All ( $\geq 45$ )             | 1999 | Smoke-free legislation                  | AMI, angina, ischemic heart disease, asthma, COPD, Lung Infection — hospitalization rate                                               | Moderate |
| Ozierański et al. (2019) <sup>111</sup>   | ITS (Poland)       | All ( $\geq 20$ )             | 2010 | Smoke-free legislation                  | AMI — hospitalization rate                                                                                                             | High     |
| Page et al. (2012) <sup>112</sup>         | ITS (USA)          | Female ( $< 18 - \geq 35$ )   | 2003 | Smoke-free legislation                  | Birth outcomes                                                                                                                         | High     |
| Patanavanich et al. (2020) <sup>113</sup> | ITS (Thailand)     | All ( $\geq 18$ )             | 1992 | Smoke-free legislation, Tobacco tax     | AMI — hospitalization rate                                                                                                             | High     |
| Patrick et al. (2016) <sup>114</sup>      | ITS (USA)          | All ( $< 1$ )                 | NA   | Tobacco tax, Cigarette price            | Infant mortality rate                                                                                                                  | High     |

|                                              |                          |                                    |            |                         |                                                                                                           |          |
|----------------------------------------------|--------------------------|------------------------------------|------------|-------------------------|-----------------------------------------------------------------------------------------------------------|----------|
| Peelen et al. (2016) <sup>115</sup>          | ITS (Netherlands)        | All (24-48 gestational weeks)      | 2004, 2008 | Tobacco control program | Perinatal mortality, stillbirth — rate                                                                    | High     |
| Pell et al. (2008) <sup>116</sup>            | Longitudinal (Scotland)  | All ( $\leq 65$ )                  | 2006       | Smoke-free legislation  | Acute coronary syndrome — hospitalization rate                                                            | High     |
| Polus et al. (2021) <sup>117</sup>           | ITS (Germany)            | All ( $\leq 32$ gestational weeks) | 2008       | Smoke-free legislation  | Stillbirth rate                                                                                           | High     |
| Rajkumar et al. (2014) <sup>118</sup>        | Cohort (Switzerland)     | All (18-65)                        | 2010       | Smoke-free legislation  | Heart rate variability, pulse wave velocity                                                               | Low      |
| Rodu et al. (2012) <sup>119</sup>            | CBA (USA)                | All ( $\geq 45$ )                  | 1995       | Smoke-free legislation  | AMI — mortality rate                                                                                      | High     |
| Sargent et al. (2004) <sup>120</sup>         | CBA (USA)                | All ( $\geq 18$ )                  | 2002       | Smoke-free legislation  | AMI — hospitalization rate                                                                                | Moderate |
| Sargent et al. (2012) <sup>121</sup>         | Cohort (Germany)         | All ( $\geq 30$ )                  | 2007       | Smoke-free legislation  | Angina, AMI — hospitalization rate                                                                        | High     |
| Schoj et al. (2010) <sup>122</sup>           | Longitudinal (Argentina) | All (21.8-46.3)                    | 2007       | Smoke-free legislation  | Respiratory symptoms, sensory symptoms — prevalence                                                       | Moderate |
| Sebrie et al. (2013) <sup>123</sup>          | ITS (Uruguay)            | All ( $\geq 20$ )                  | 2006       | Smoke-free legislation  | AMI — hospitalization rate                                                                                | High     |
| Seguret et al. (2014) <sup>124</sup>         | ITS (France)             | All ( $\geq 18$ )                  | 2007       | Smoke-free legislation  | Acute coronary syndrome — hospitalization rate                                                            | High     |
| Sen & Piérard (2011) <sup>125</sup>          | CBA (Canada)             | All (NA)                           | 1994       | Tobacco tax             | Birth outcomes                                                                                            | High     |
| Seo et al. (2007) <sup>126</sup>             | Cross-sectional (USA)    | NA (NA)                            | 2003       | Smoke-free legislation  | AMI — hospitalization rate                                                                                | High     |
| Shelley et al. (2007) <sup>127</sup>         | Cross-sectional (USA)    | All (18-74)                        | 2003       | Smoke-free legislation  | Health status (excellent or fair/poor)                                                                    | High     |
| Shetty et al. (2009) <sup>128</sup>          | CBA (USA)                | All (0-65)                         | 1990       | Smoke-free legislation  | AMI — hospitalization rate, mortality rate                                                                | High     |
| Simón et al. (2017) <sup>129</sup>           | Cross-sectional (Spain)  | All (26-42 gestational weeks)      | 2006-2011  | Smoke-free legislation  | Birth outcomes                                                                                            | High     |
| Sims et al. (2010) <sup>130</sup>            | ITS (England)            | All ( $\geq 18$ )                  | 2007       | Smoke-free legislation  | Myocardial infarction — hospitalization rate                                                              | High     |
| Stallings-Smith et al. (2013) <sup>131</sup> | ITS (Ireland)            | All ( $\geq 35$ )                  | 2004       | Smoke-free legislation  | All, cardiovascular disease, Ischemic heart disease, AMI, stroke, and respiratory disease— mortality risk | Low      |
| Stallings-Smith et al. (2014) <sup>132</sup> | ITS (Ireland)            | All ( $\geq 35$ )                  | 2004       | Smoke-free legislation  | Ischemic heart disease, stroke, COPD — mortality rate                                                     | High     |

|                                             |                               |                               |           |                                |                                                                                                        |          |
|---------------------------------------------|-------------------------------|-------------------------------|-----------|--------------------------------|--------------------------------------------------------------------------------------------------------|----------|
| Thach et al. (2016) <sup>133</sup>          | ITS (China)                   | All ( $\geq 0$ )              | 2007      | Smoke-free legislation         | Ischemic heart disease, AMI, cardiovascular disease, respiratory disease, lung cancer — mortality rate | Low      |
| Trachsel et al. (2010) <sup>134</sup>       | Cross-sectional (Switzerland) | All ( $\geq 0$ )              | 2008      | Smoke-free legislation         | AMI — hospitalization rate                                                                             | High     |
| Weg et al. (2012) <sup>135</sup>            | CBA (USA)                     | All ( $\geq 65$ )             | 1991-2008 | Smoke-free legislation         | AMI — hospitalization rate                                                                             | Low      |
| Vicedo-Cabrera et al. (2016) <sup>136</sup> | ITS (Switzerland)             | All ( $\geq 0$ )              | 2010      | Smoke-free legislation         | Cardiovascular, respiratory diseases — hospitalization rate, mortality rate                            | Low      |
| Vicedo-Cabrera et al. (2016) <sup>137</sup> | ITS (Switzerland)             | All (22-42 gestational weeks) | 2010      | Smoke-free legislation         | Birth outcomes                                                                                         | High     |
| Villalbi et al. (2011) <sup>138</sup>       | Cross-sectional (Spain)       | All ( $\geq 0$ )              | 2012      | Smoke-free legislation         | AMI — mortality rate                                                                                   | High     |
| Weaver et al. (2018) <sup>139</sup>         | ITS (USA)                     | All ( $\geq 0$ )              | 2012      | Smoke-free legislation         | AMI — hospitalization rate                                                                             | Low      |
| Wilson et al. (2012) <sup>140</sup>         | Longitudinal (USA)            | All (21-73)                   | 2010      | Smoke-free legislation         | Respiratory symptoms — prevalence                                                                      | Moderate |
| Wu et al. (2021) <sup>141</sup>             | ITS (China)                   | All ( $\geq 18$ )             | 2015      | MPOWER                         | Cardiovascular disease — hospitalization rate                                                          | High     |
| Xiao et al. (2020) <sup>142</sup>           | ITS (China)                   | All ( $\geq 35$ )             | 2013      | Smoke-free legislation         | AMI, stroke — mortality rate                                                                           | Moderate |
| Xiao et al. (2020) <sup>143</sup>           | ITS (China)                   | All ( $\geq 0$ )              | 2013      | Smoke-free legislation         | AMI, stroke — mortality rate                                                                           | Moderate |
| Yan (2014) <sup>144</sup>                   | CBA (USA)                     | All ( $\leq 1$ )              | 1992      | Minimum cigarette purchase age | Birth outcomes                                                                                         | Low      |
| Yang et al. (2017) <sup>145</sup>           | ITS (Taiwan)                  | All ( $\geq 45$ )             | 2009      | Smoke-free legislation         | Ischemic heart disease — hospitalization rate                                                          | High     |
| Yildiz et al. (2014) <sup>146</sup>         | Cross-sectional (Turkey)      | NA (NA)                       | 2009      | Smoke-free legislation         | Smoking-related diseases — emergency visits rate                                                       | High     |

<sup>1</sup>Based on study design (Newcastle-Ottawa Scale for observational studies and EPOC risk of bias for non-randomized studies)

CBA, controlled before and after study; ITS, interrupted time series; QE, quasi experimental studies

<sup>2</sup>NA, not available

<sup>3</sup>Policies are described in the original studies; Smoke-free legislations = “clean indoor air acts”, i.e., laws banning or restricting smoking in shared spaces such as public place, workplace, restaurants, and bars; MPOWER = all six WHO-recommended tobacco control policies, i.e., monitoring tobacco use and prevention policies, protecting people from tobacco smoke, offering help to quit tobacco use, warning about the dangers of tobacco, enforcing bans on tobacco advertising and sponsorship, and raising taxes on tobacco; Tobacco control programs are composed of multiple interventions such as smoking ban, tax increase, mass media campaign, smoking cessation service, community and school programs, etc; Tobacco retailer density = number of tobacco retailers per population

<sup>4</sup>Outcomes are described in the original studies; AMI = Acute Myocardial Infarction; COPD = Chronic Obstructive Pulmonary Diseases



**eFigure 2.** Forest Plot of Meta-analysis of the Studies Examining the Associations of Smoke-free Legislation With Cardiovascular Disease (CVD), CVD Hospitalization, Respiratory Disease Hospitalization, CVD Mortality, Cancer, Respiratory Symptoms, Birth Weight, and Gestational Age Based on Coefficient Results

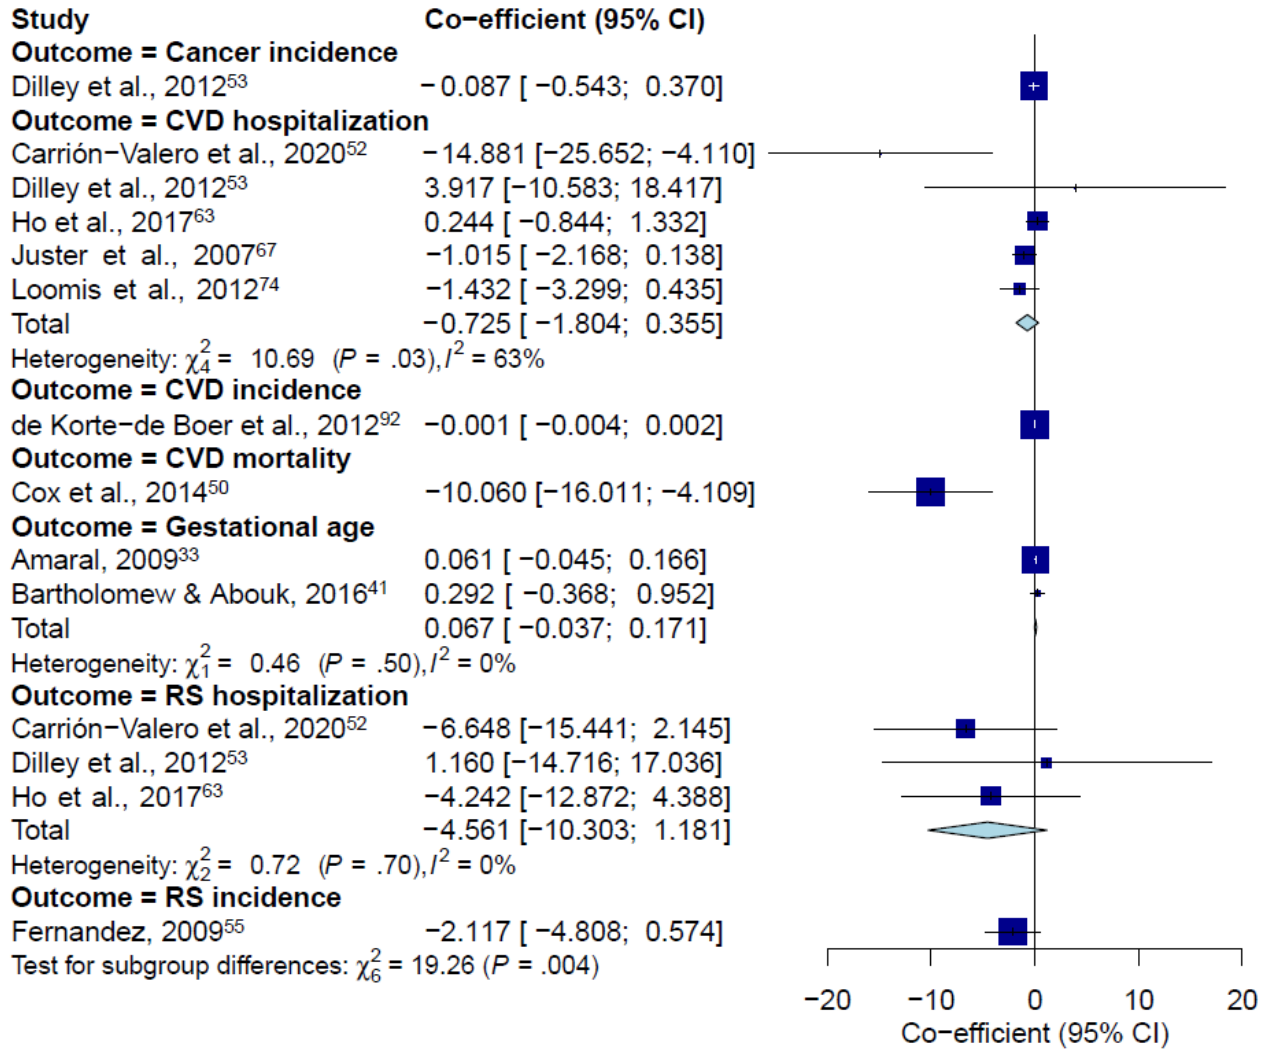

**eFigure 3.** Meta-analysis of the Association of Smoke-free Legislation With Perinatal Mortality and Adverse Birth Outcomes

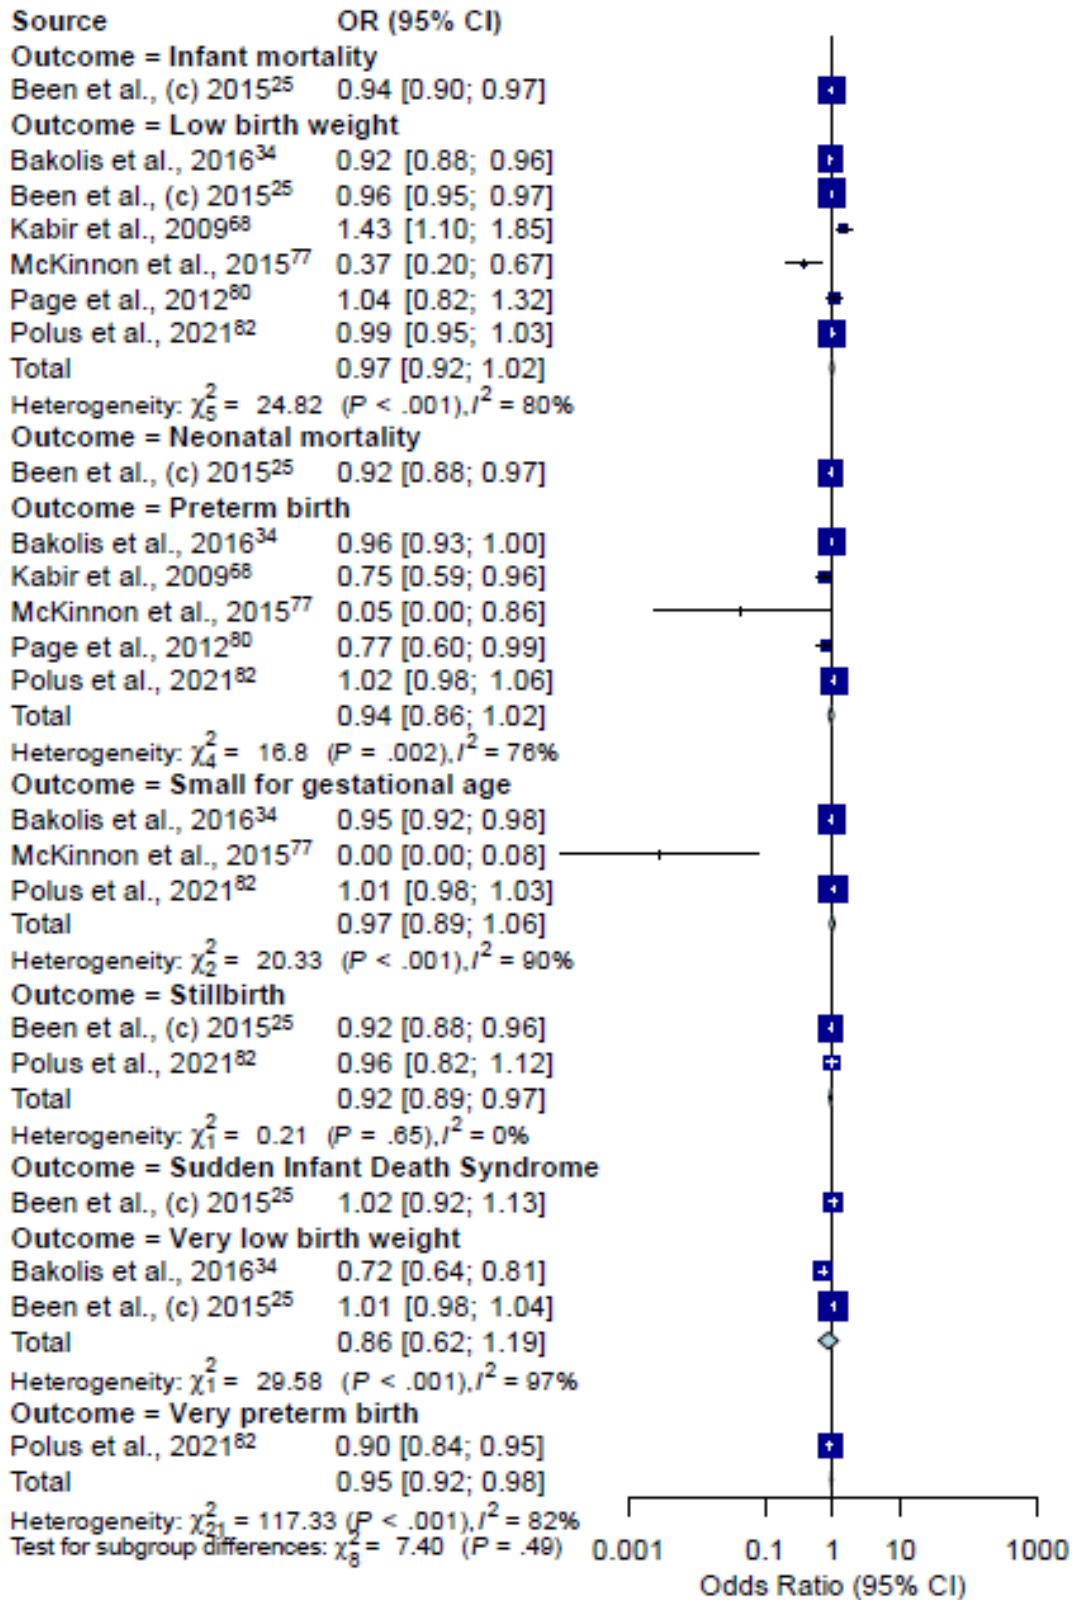

**eFigure 4.** Forest Plot of Meta-analysis of Studies Examining the Association of Tax or Price Increase With Hospitalization Due to Cardiovascular Disease or Respiratory Symptoms

| Source                                                         | OR (95% CI)       |
|----------------------------------------------------------------|-------------------|
| <b>Outcome = RS incidence</b>                                  |                   |
| Hatoun et al., 2018 <sup>60</sup>                              | 1.40 [1.09; 1.79] |
| Hawkins et al., 2016 <sup>61</sup>                             | 0.96 [0.92; 1.00] |
| Total                                                          | 1.13 [0.78; 1.64] |
| Heterogeneity: $\chi^2_1 = 8.98$ ( $P = .003$ ), $I^2 = 89\%$  |                   |
| <b>Outcome = CVD hospitalization</b>                           |                   |
| Jan et al., 2014 <sup>66</sup>                                 | 0.99 [0.97; 1.00] |
| Patanavanich et al., 2020 <sup>81</sup>                        | 1.00 [0.98; 1.02] |
| Total                                                          | 0.99 [0.98; 1.00] |
| Heterogeneity: $\chi^2_1 = 1.19$ ( $P = .28$ ), $I^2 = 16\%$   |                   |
| Total                                                          | 0.99 [0.96; 1.02] |
| Heterogeneity: $\chi^2_3 = 11.50$ ( $P = .009$ ), $I^2 = 74\%$ |                   |
| Test for subgroup differences: $\chi^2_1 = 0.51$ ( $P = .47$ ) |                   |

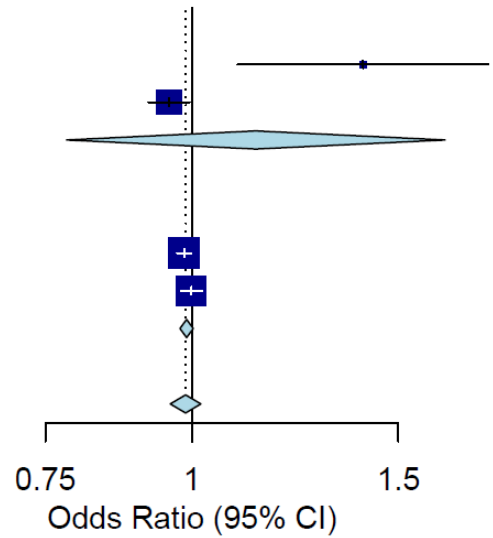

**eFigure 5.** Forest Plot of Meta-analysis of the Studies Examining the Association of Tax or Price Increase With Total Mortality, Cardiovascular Disease Mortality, Cancer Mortality, Respiratory Disease Mortality, Cardiovascular Disease Hospitalization, and Respiratory Disease Hospitalization Based on Coefficient Results

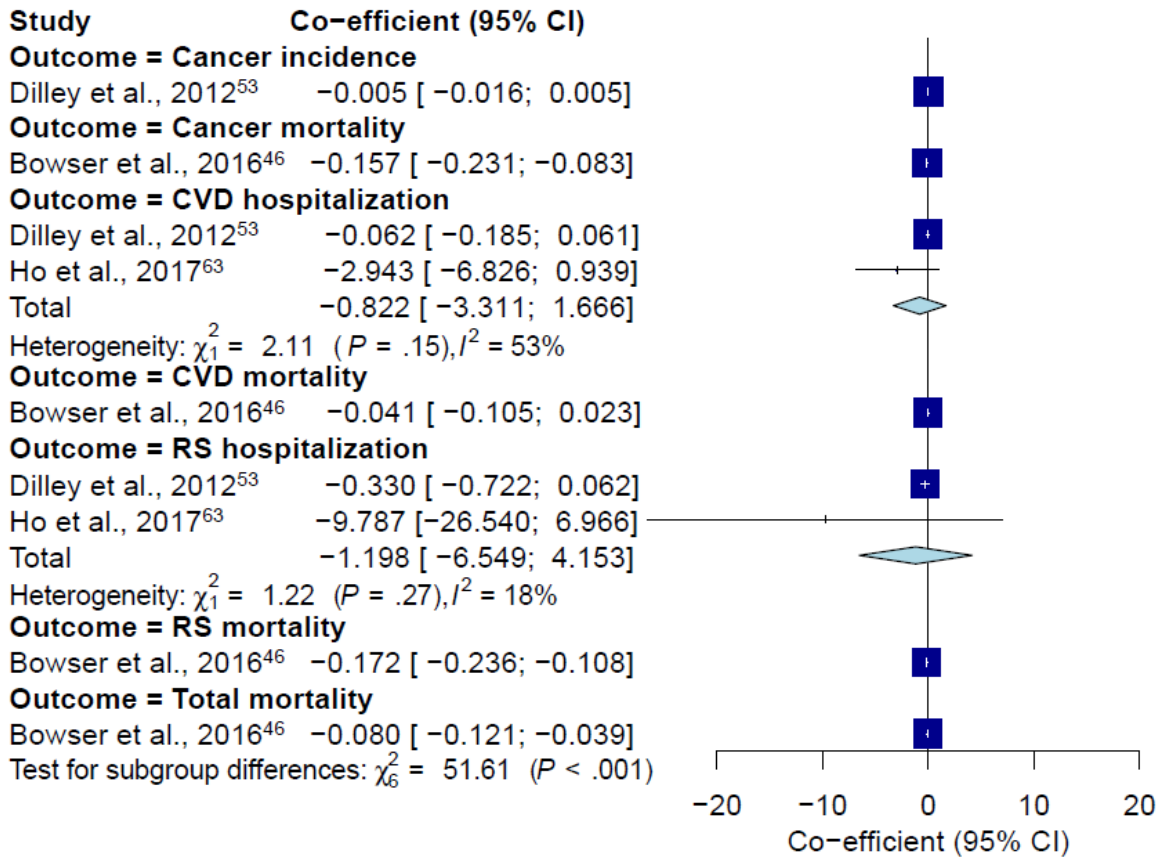

**eFigure 6.** Forest Plot of Meta-analysis of Studies Examining the Synergistic Associations of Tobacco Control Program (Combination of Several Tobacco Control Laws) With Cardiovascular Disease Hospitalization, Cardiovascular Disease Mortality, and Cancer Based on Coefficient Results

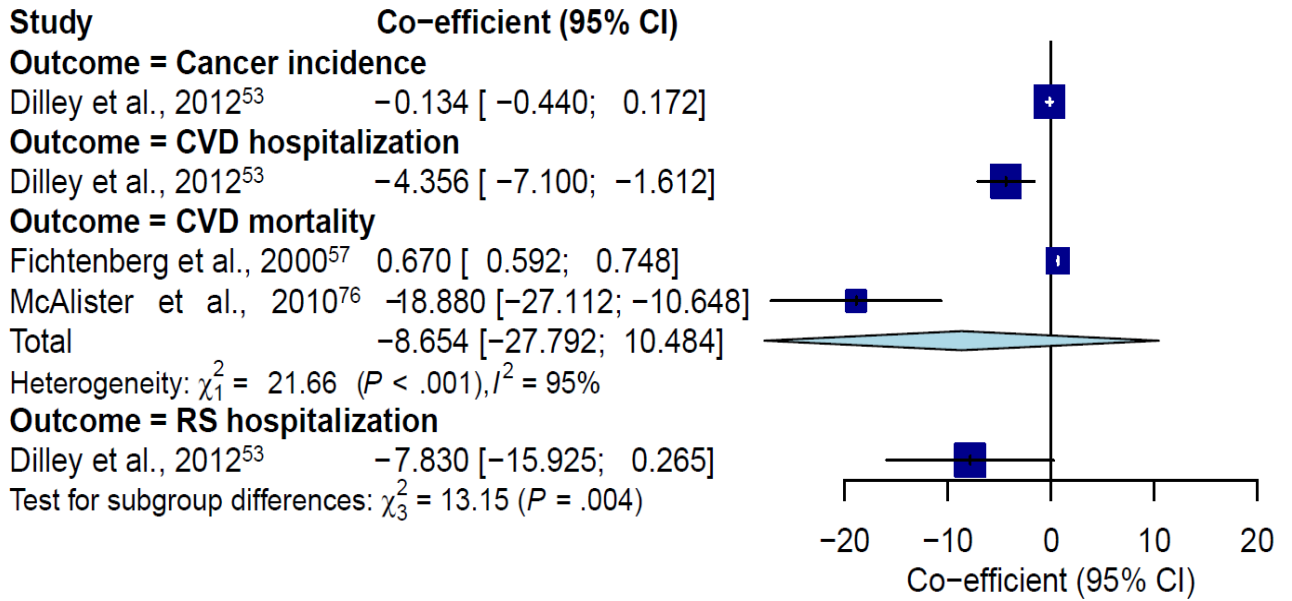

### **eAppendix 3.** Sensitivity Analyses

Visual inspection of funnel plots indicated asymmetries in studies reporting the impact of smoke-free legislation on CVD events, respiratory diseases, birth outcomes, and CVD- and respiratory disease-related hospitalisations, which raises the possibility of publication bias ( eFigures 7-9). To account for any publication bias, we performed sensitivity analyses using the trim-and-fill method (eFigures 7-9 and eTable 12). Results including the hypothetical studies showed a statistically significant negative association between smoke-free legislation and the occurrence of CVD events (OR, 0.92; 95% CI, 0.89-0.97), respiratory disease/symptom events (OR, 0.77; 95% CI, 0.67-0.89), adverse birth outcomes (OR, 95; 95% CI, 0.91-0.98), and hospitalisations due to respiratory disease/symptoms (OR, 0.91; 95% CI, 0.89-0.93). After dropping two highly influential studies (large sample size and small standard error), the smoke-free legislation remained significantly associated with reduced risks of CVD events, respiratory disease events, and hospitalisations due to CVD and respiratory diseases.

**eFigure 7.** Publication Bias Assessment for Cardiovascular Diseases

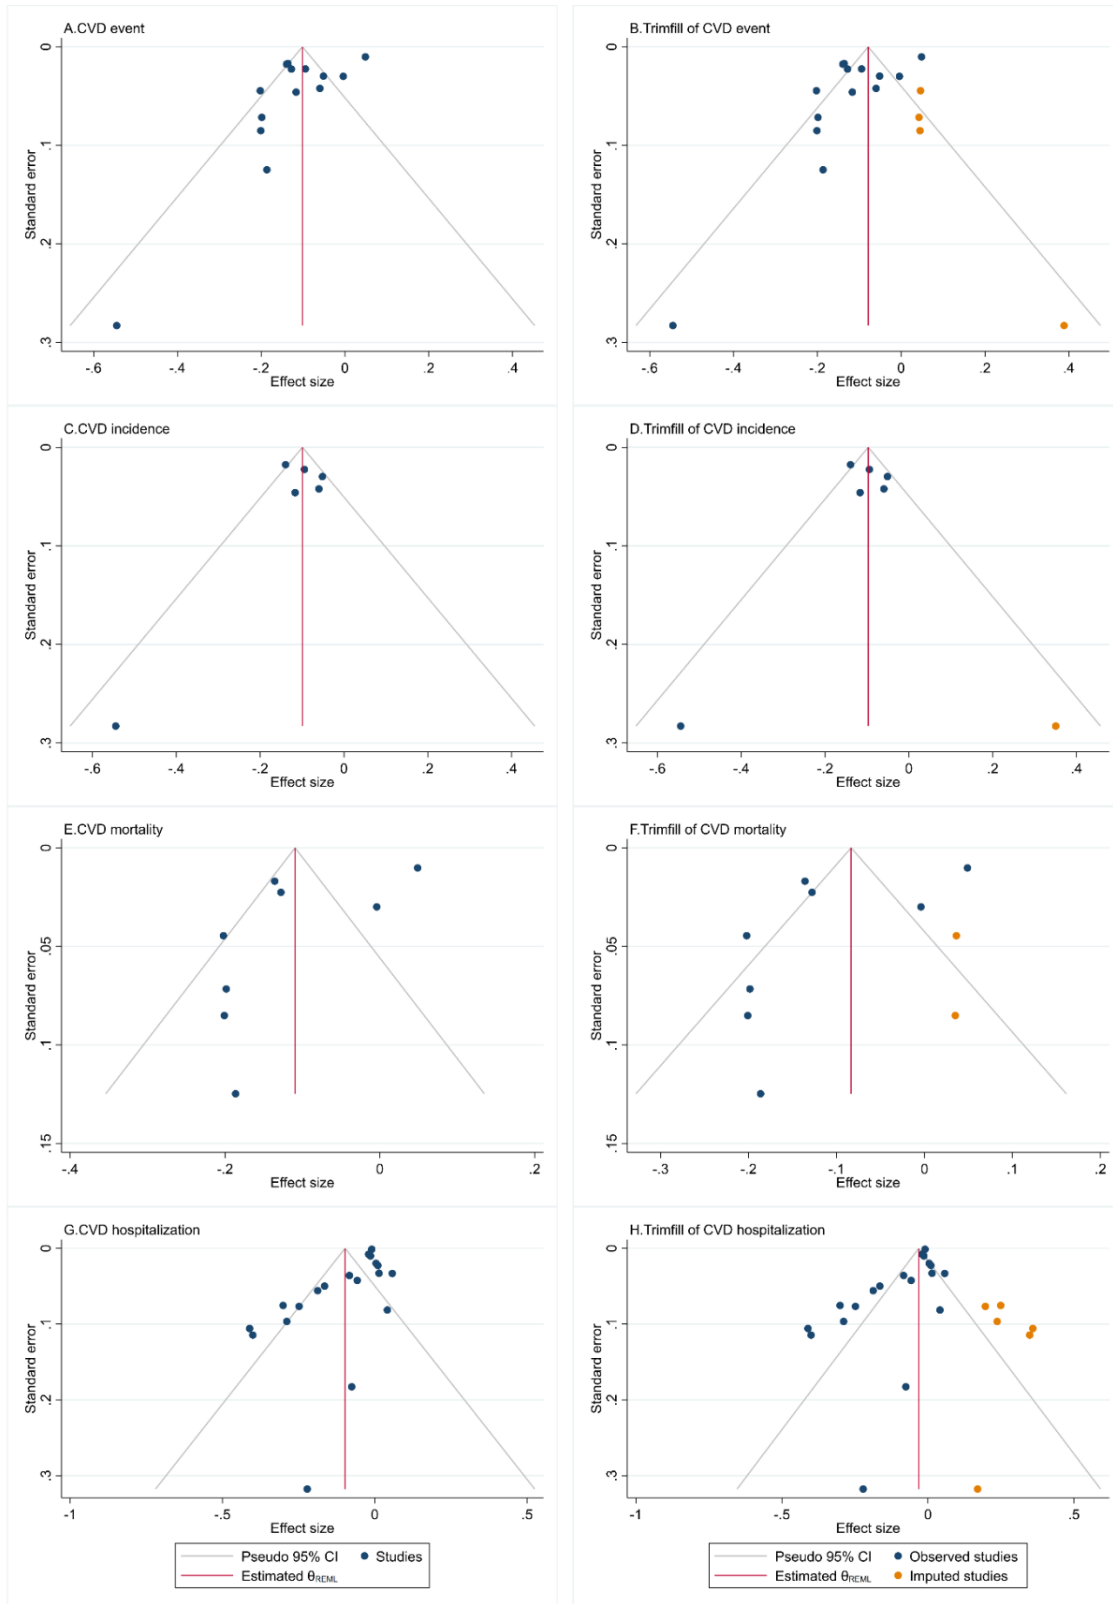

**eFigure 8.** Publication Bias Assessment for Smoke-free Legislation and Respiratory Disease and Symptoms

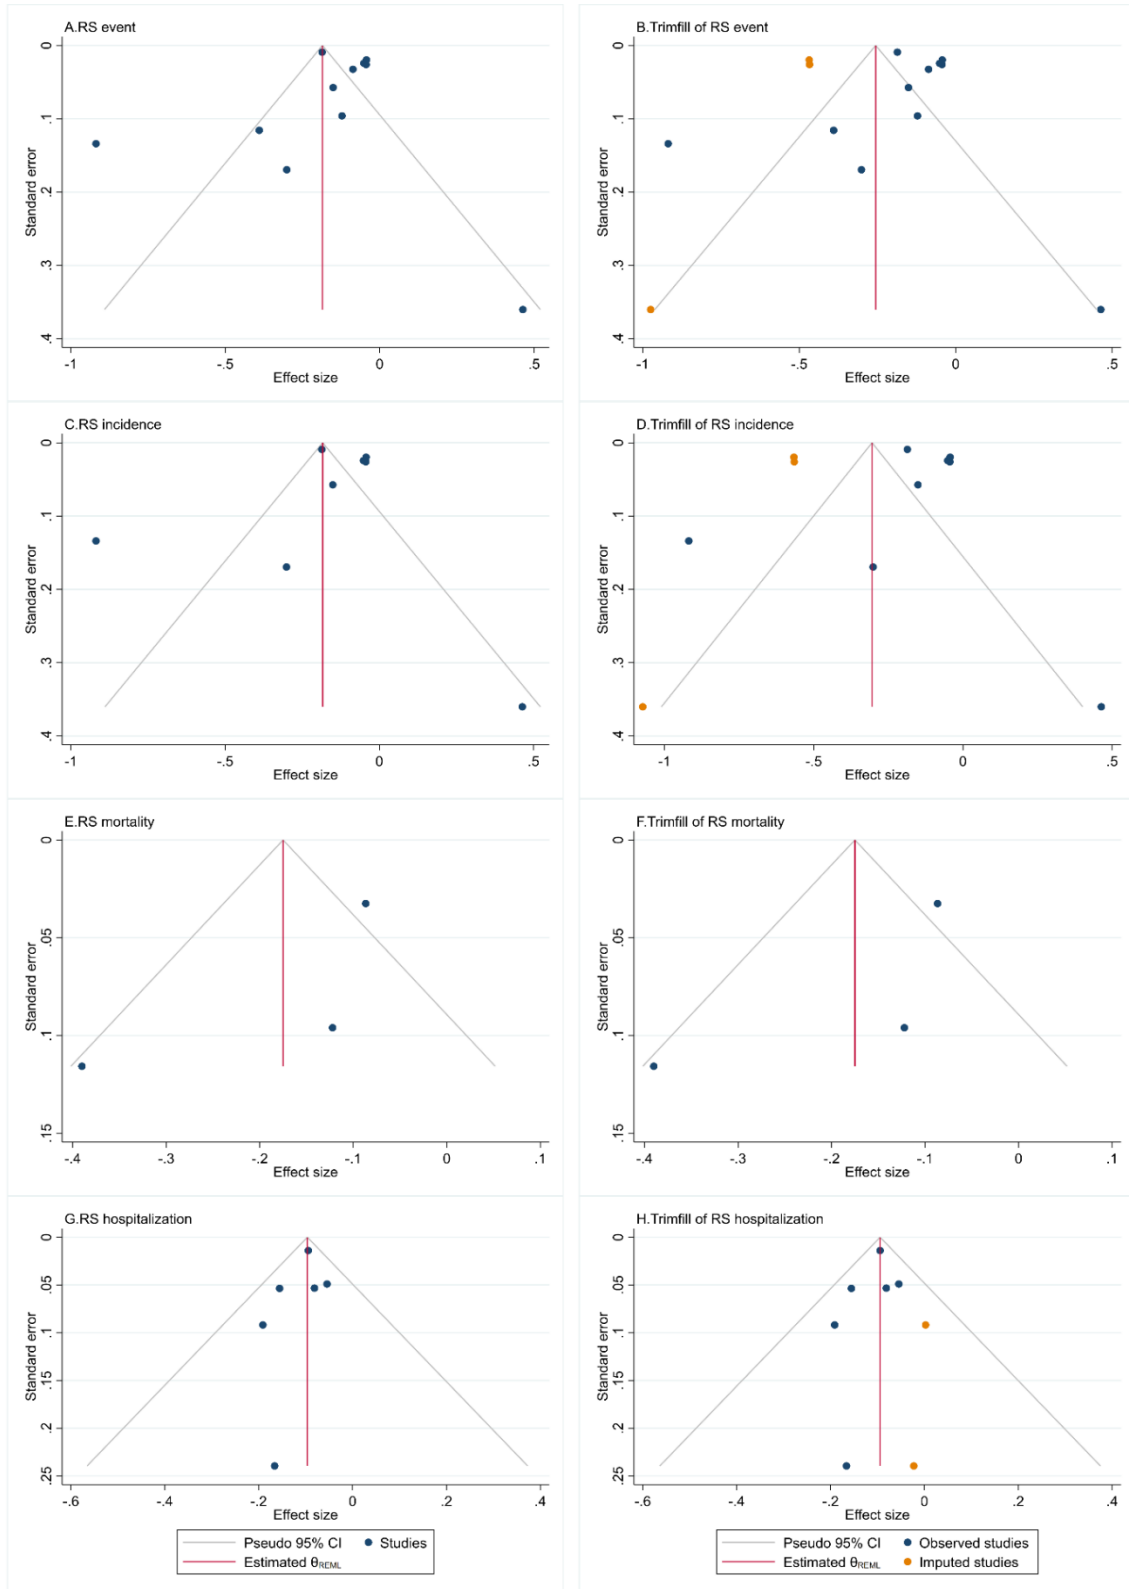



**eFigure 9.** Publication Bias Assessment for Smoke-free Legislation and Perinatal Mortality and Adverse Birth Outcomes

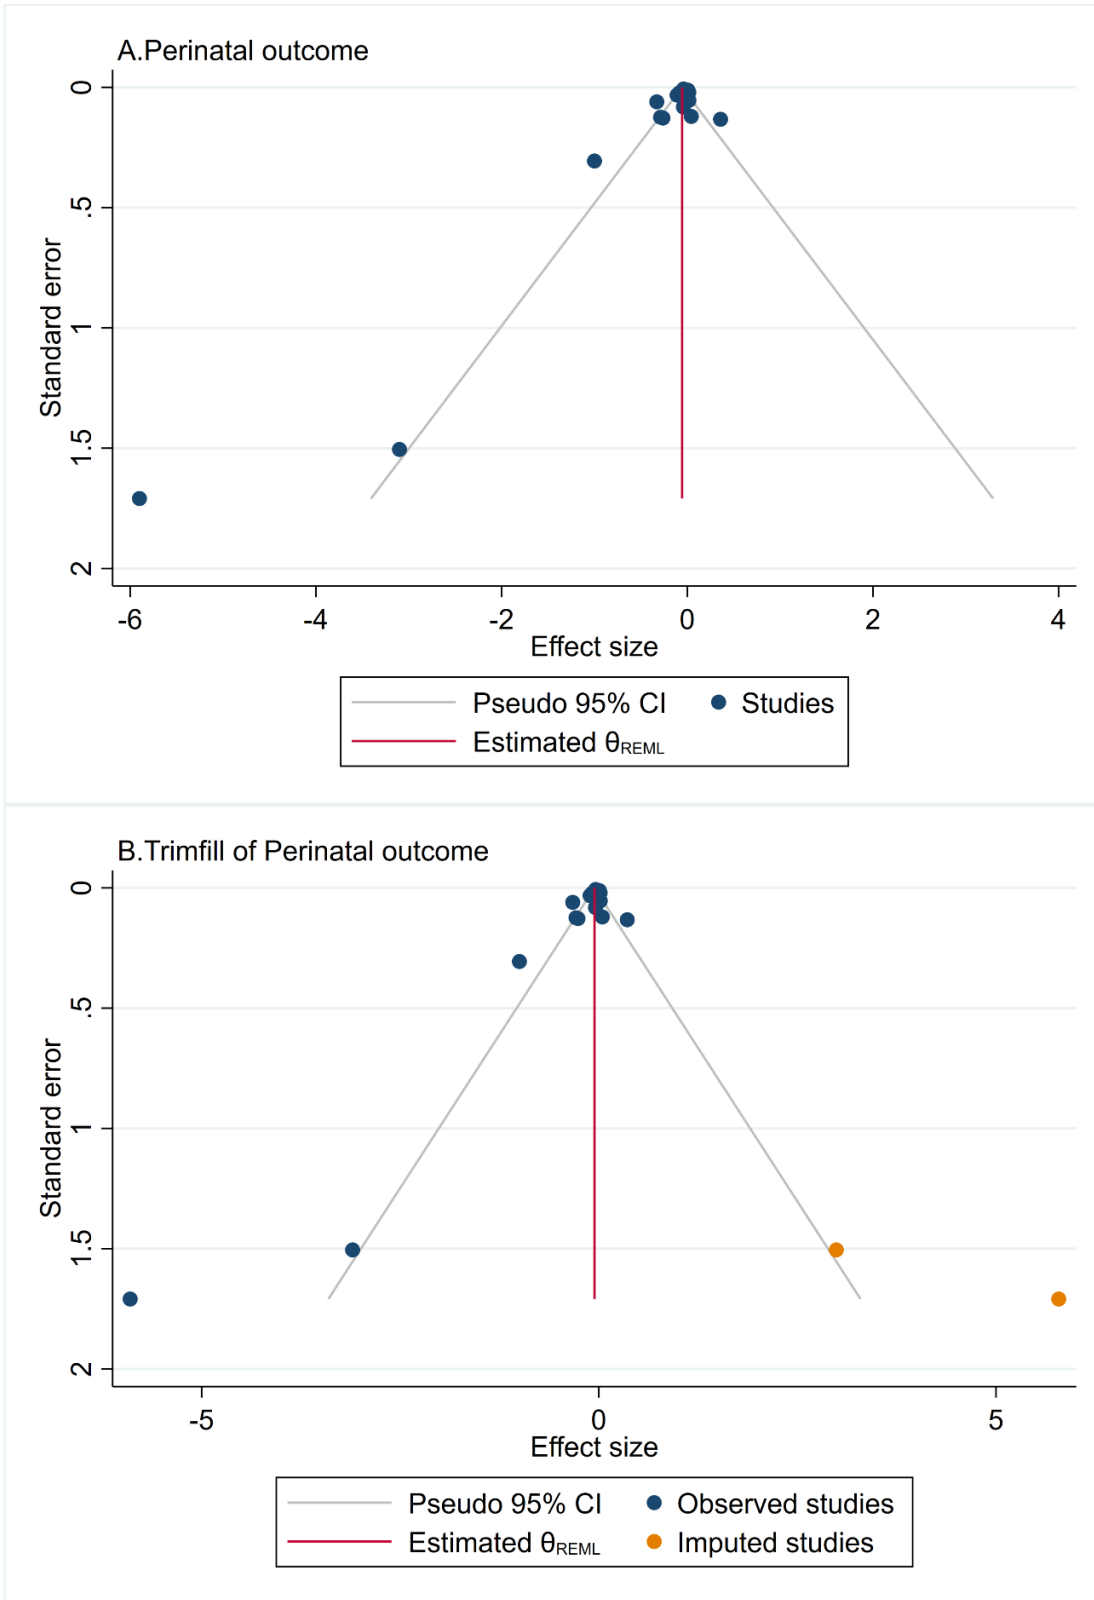

**eTable 8.** Summary, Publication Bias, and Trim-and-Fill Estimates

| Outcome by smoke-free legislation     | Summary estimates <sup>a</sup> |                  |                     | Sensitivity analysis <sup>b</sup> | Trim- and-fill estimates <sup>c</sup> |                |
|---------------------------------------|--------------------------------|------------------|---------------------|-----------------------------------|---------------------------------------|----------------|
|                                       | No. of studies                 | OR (95% CI)      | <i>P</i> -bias test | OR (95% CI)                       | OR (95% CI)                           | N <sup>d</sup> |
| <b>Cardiovascular diseases</b>        |                                |                  |                     |                                   |                                       |                |
| Incidence/Prevalence                  | 6                              | 0.91 (0.87-0.94) | 0.291               | 0.93 (0.89-0.97)                  | 0.91 (0.87-0.94)                      | 1              |
| Mortality                             | 8                              | 0.9 (0.83-0.97)  | 0.072               | 0.91 (0.87-0.94)                  | 0.92 (0.86-0.98)                      | 2              |
| All (incidence/prevalence /mortality) | 14                             | 0.9 (0.86-0.94)  | 0.015               | 0.89 (0.86-0.92)                  | 0.92 (0.89-0.97)                      | 4              |
| <b>Respiratory symptom</b>            |                                |                  |                     |                                   |                                       |                |
| Incidence/Prevalence                  | 8                              | 0.83 (0.72-0.96) | 0.861               | 0.81 (0.59-1.11)                  | 0.74 (0.6-0.9)                        | 3              |
| Mortality                             | 3                              | 0.84 (0.71-0.99) | 0.232               | 0.78 (0.6-1.01)                   | 0.84 (0.71-0.99)                      | 0              |
| All (incidence/prevalence /mortality) | 11                             | 0.83 (0.72-0.96) | 0.730               | 0.81 (0.67-0.99)                  | 0.77 (0.67-0.89)                      | 3              |
| <b>Hospitalization</b>                |                                |                  |                     |                                   |                                       |                |
| Cardiovascular diseases               | 19                             | 0.91 (0.85-0.96) | 0.000               | 0.89 (0.83-0.96)                  | 0.97 (0.9-1.05)                       | 6              |
| Respiratory symptom                   | 6                              | 0.91 (0.89-0.93) | 0.488               | 0.88 (0.82-0.94)                  | 0.91 (0.89-0.93)                      | 2              |
| <b>Perinatal/birth outcome</b>        | 12                             | 0.95 (0.91-0.98) | 0.0001              | 0.86 (0.72-1.01)                  | 0.95 (0.91-0.98)                      | 2              |

<sup>a</sup>Pooled OR based on all studies

<sup>b</sup>Pooled OR based on after dropping two highly influential studies

<sup>c</sup>Trim-and-fill method simulated studies that were likely to be missing from the literature because of publication or other forms of bias. Trim-and-fill RRs estimate what the pooled RRs would be if the missing studies were included in the analysis.

<sup>d</sup>Missing studies

CI, confidence interval; PI, prediction interval

#### **eAppendix 4.** Stratified Analysis

We found evidence of large heterogeneity in the association between smoke-free legislation and CVD events, respiratory disease/symptom events, hospitalisation due to CVD and respiratory disease/symptoms, and adverse birth outcomes (eTable 9). In the stratified analysis, the ORs differed across country-income categories. The reduced risk of CVD events and hospitalisations due to CVD appeared more pronounced when smoke-free legislations were implemented in high-income countries. Subgroup analysis by quality score showed that smoke-free legislation was significantly associated with reduced risks of CVD events and CVD-related hospitalisations in high-quality studies only. However, neither the study design nor the variation in quality scores was found to explain the heterogeneity.

As it is suggested that health benefits vary according to the comprehensiveness of smoke-free legislation, we performed an additional subgroup analysis for comprehensive legislation (banning smoking in designated public facilities<sup>147</sup>) and partial legislation. We found a similar association in studies with comprehensive and partial smoke-free legislations (eTable 10).

**eTable 9.** Stratified Analysis According to Study Design, Country Income Category and Quality Score  
(For studies on smoke-free legislation policies).

| Characteristic                 | No. of studies | Pooled RR (95% CI) | P                              |                 |
|--------------------------------|----------------|--------------------|--------------------------------|-----------------|
|                                |                |                    | Heterogeneity, $I^2$ (P value) | Meta regression |
| <b>CVD event</b>               |                |                    |                                |                 |
| <b>Study design</b>            |                |                    |                                |                 |
| CBA                            | 1              | 0.87 (0.84-0.90)   | NA                             | 0.75            |
| Cross-sectional                | 1              | 0.88 (0.84-0.92)   | NA                             |                 |
| Interrupted Time-series        | 2              | 0.78 (0.55-1.12)   | 0.00                           |                 |
| Longitudinal                   | 11             | 0.91 (0.87-0.96)   | 0.15                           |                 |
| <b>Country income category</b> |                |                    |                                |                 |
| Low and middle income          | 2              | 1.03 (0.98-1.08)   | 0.10                           | 0.00            |
| High income                    | 12             | 0.88 (0.86-0.91)   | 0.07                           |                 |
| <b>Quality score</b>           |                |                    |                                |                 |
| Low                            | NA             |                    |                                | 0.03            |
| Moderate                       | 6              | 0.94 (0.88-1.01)   | 0.00                           |                 |
| High                           | 8              | 0.88 (0.85-0.91)   | 0.07                           |                 |
|                                |                |                    |                                |                 |
| <b>CVD mortality</b>           |                |                    |                                |                 |
| <b>Study design</b>            |                |                    |                                |                 |
| Cross-sectional                | 1              | 0.88 (0.84-0.92)   | NA                             | 0.96            |
| Longitudinal                   | 1              | 0.87 (0.84-0.9)    | NA                             |                 |
| Interrupted Time-series        | 6              | 0.90 (0.81-1)      | 0.00                           |                 |
| <b>Country income category</b> |                |                    |                                |                 |
| Low and middle income          | 2              | 1.03 (0.98-1.08)   | 0.10                           | 0.00            |
| High income                    | 6              | 0.87 (0.85-0.89)   | 0.61                           |                 |
| <b>Quality score</b>           |                |                    |                                |                 |
| Low                            | NA             |                    |                                | 0.004           |
| Moderate                       | 3              | 0.96 (0.84-1.1)    | 0.00                           |                 |
| High                           | 5              | 0.9 (0.83-0.97)    | 0.57                           |                 |
|                                |                |                    |                                |                 |
| <b>CVD hospitalization</b>     |                |                    |                                |                 |
| <b>Study design</b>            |                |                    |                                |                 |
| Cross-sectional                | 3              | 0.86 (0.77-0.97)   | 0.05                           | 0.12            |
| CBA                            | 4              | 0.81 (0.66-0.99)   | 0.00                           |                 |
| Interrupted Time-series        | 12             | 0.99 (0.98-0.99)   | 0.00                           |                 |
| <b>Country income category</b> |                |                    |                                |                 |

|                                      |    |                  |      |      |
|--------------------------------------|----|------------------|------|------|
| Low and middle income                | 2  | 1.01 (0.97-1.04) | 0.66 | 0.18 |
| High income                          | 17 | 0.89 (0.83-0.95) | 0.00 |      |
| <b>Quality score</b>                 |    |                  |      |      |
| Low                                  | 2  | 0.92 (0.68-1.24) | 0.00 | 0.30 |
| Moderate                             | 4  | 0.98 (0.95-1.01) | 0.14 |      |
| High                                 | 13 | 0.87 (0.8-0.95)  | 0.00 |      |
|                                      |    |                  |      |      |
| <b>Respiratory disease event</b>     |    |                  |      |      |
| <b>Study design</b>                  |    |                  |      |      |
| Cross-sectional                      | 2  | 1.02 (0.49-2.12) | 0.05 | 0.47 |
| Longitudinal                         | 2  | 0.61 (0.27-1.38) | 0.00 |      |
| Interrupted Time-series              | 6  | 0.90 (0.83-0.97) | 0.00 |      |
| Retrospective cohort                 | 1  | 0.86 (0.77-0.96) | NA   |      |
| <b>Quality score</b>                 |    |                  |      |      |
| Low                                  | 1  | 0.68 (0.54-0.85) |      | 0.35 |
| Moderate                             | 2  | 1.08 (0.7-1.69)  | 0.15 |      |
| High                                 | 8  | 0.81 (0.68-0.97) | 0.00 |      |
|                                      |    |                  |      |      |
| <b>Respiratory disease incidence</b> |    |                  |      |      |
| <b>Study design</b>                  |    |                  |      |      |
| Cross-sectional                      | 2  | 1.02 (0.49-2.12) | 0.05 | 0.00 |
| Longitudinal                         | 1  | 0.40 (0.31-0.52) | NA   |      |
| Interrupted Time-series              | 4  | 0.92 (0.86-0.99) | 0.00 |      |
| Retrospective cohort                 | 1  | 0.86 (0.77-0.96) | NA   |      |
| <b>Quality score</b>                 |    |                  |      |      |
| Low                                  | NA |                  |      |      |
| Moderate                             | 2  | 1.08 (0.70-1.69) | 0.15 | 0.21 |
| High                                 | 6  | 0.78 (0.60-0.99) | 0.00 |      |

**eTable 10.** Stratified Analysis According to Comprehensiveness of Smoke-free Legislation

| Characteristic                                    | No. of studies | Pooled RR (95% CI) | P                              |                 |
|---------------------------------------------------|----------------|--------------------|--------------------------------|-----------------|
|                                                   |                |                    | Heterogeneity, $I^2$ (P value) | Meta regression |
| <b>CVD event</b>                                  |                |                    |                                |                 |
| Comprehensive ban                                 | 7              | 0.91 (0.84-0.99)   | 0.00                           | 0.48            |
| Limited ban                                       | 7              | 0.89 (0.86-0.92)   | 0.05                           |                 |
| <b>Respiratory disease event</b>                  |                |                    |                                |                 |
| Comprehensive ban                                 | 3              | 0.85 (0.7-1.03)    | 0.01                           | 0.95            |
| Limited ban                                       | 8              | 0.83 (0.67-1.02)   | 0.00                           |                 |
| <b>Hospitalization due to CVD</b>                 |                |                    |                                |                 |
| Comprehensive ban                                 | 12             | 0.91 (0.84-0.98)   | 0.00                           | 0.97            |
| Limited ban                                       | 5              | 0.91 (0.81-1.01)   | 0.00                           |                 |
| <b>Hospitalization due to respiratory disease</b> |                |                    |                                |                 |
| Comprehensive ban                                 | 3              | 0.91 (0.88-0.93)   | 0.52                           | 0.82            |
| Limited ban                                       | 3              | 0.9 (0.81-1.01)    | 0.40                           |                 |

**eTable 11.** Narrative Summary of Adverse Health Outcomes Following the Implementation of the Smoking Ban

| Outcome                                  | Study                      | Participants (Country)     | Findings                                                                                                                                                                                                                                              | Conclusion                                                                            |
|------------------------------------------|----------------------------|----------------------------|-------------------------------------------------------------------------------------------------------------------------------------------------------------------------------------------------------------------------------------------------------|---------------------------------------------------------------------------------------|
| <b>Cardiovascular Disease</b>            |                            |                            |                                                                                                                                                                                                                                                       |                                                                                       |
| <b>Acute Myocardial Infarction (AMI)</b> |                            |                            |                                                                                                                                                                                                                                                       |                                                                                       |
| Hospitalization rate, mortality rate     | Abe et al. 2017            | NA (Brazil)                | After implementation of the smoking ban, there was a reduction in myocardial infarction mortality rate (-11.9% after 17 months, $p<0.001$ ) and hospital admission rate (-5.4% after 3 months, $p=0.022$ ).                                           |    |
| Hospitalization rate                     | Barr et al. 2012           | Adults (USA)               | An immediate effect of the comprehensive smoking ban was a decrease in AMI hospitalization rate (-5.4%; 95% CI: -8.2 to -2.5)                                                                                                                         |    |
| Hospitalization rate                     | Bonetti 2011               | AMI patients (Switzerland) | In Graubünden, the number of patients with AMI significantly decreased two years after the implementation of the smoking ban (-21%; $p<0.05$ ).                                                                                                       |    |
| Hospitalization rate                     | Carrión-Valero et al. 2020 | Adults (Spain)             | After two successive smoking ban implementations in 2005 and 2010, there was an overall marked drop by 27% in hospital admission rates for AMI.                                                                                                       |    |
| Mortality rate                           | Dove et al. 2010           | Adults (USA)               | The AMI mortality rate significantly decreased by 7.4% (95% CI: 3.3% to 11.4%) after the implementation of the state smoking ban ( $p<0.001$ ).                                                                                                       |    |
| Hospitalization rate                     | Galán et al. 2015          | NA (Spain)                 | In Barcelona, a 6.3% (95% CI: -2.9 to 14.7) in hospital admissions for AMI following implementation of a partial smoking ban was not non-significant.                                                                                                 |    |
| Hospitalization rate                     | Galán et al. 2018          | Adults (Spain)             | There was no significant change in hospitalizations for AMI among patients aged $\geq 18$ years following implementation of partial (-18%; 95% CI: -6.7 to 3.5) and comprehensive (-2.3%; 95% CI: -5.2 to 0.6), $p>0.05$ , smoking bans in Spain.     |  |
| Hospitalization rate                     | Gaudreau et al. 2013       | NA (Canada)                | After the smoking ban, the mean rate of admissions due to AMI significantly decreased by 5.92 cases per 100,000 person-months (95% CI: -0.39 to 11.44) ( $p=0.04$ ), representing a 13.6% ( $p=0.03$ ) immediately drop.                              |  |
| Hospitalization rate                     | Herman & Welsh 2011        | Adults (USA)               | After statewide smoking ban implementation, there was a 13% ( $p=0.01$ ) reduction in AMI hospital admissions. This estimate is based on drops in counties with only a statewide ban in place, compared to those with both statewide and county bans. |  |

|                                      |                        |                                           |                                                                                                                                                                                                                                             |                                                                                       |
|--------------------------------------|------------------------|-------------------------------------------|---------------------------------------------------------------------------------------------------------------------------------------------------------------------------------------------------------------------------------------------|---------------------------------------------------------------------------------------|
| Incidence rate                       | Johnson & Beal 2013    | Hospitalized patients (USA)               | Pre- to post- implementation of a comprehensive smoke-free law, the heart attack incidence rate significantly decreased, i.e., from 0.5% to 0.3% ( $p=0.023$ ), respectively.                                                               |    |
| Mortality rate                       | Johnson & Beal 2013    | Patients admitted for heart attacks (USA) | Pre- to post- implementation of a comprehensive smoke-free law, the heart attack mortality rate significantly decreased, i.e., from 2.5% to 1.8% ( $p<0.001$ ), respectively.                                                               |    |
| Prevalence                           | Lippert & Gustat 2012  | Adults (USA)                              | Compared to the baseline estimates, seven states/territories recorded significant decreases in prevalence of AMI after implementation of smoking bans. Drops ranged between -1.4 and -0.4% ( $p<0.05$ ).                                    |    |
| Hospitalization rate                 | Ozierański et al, 2019 | Adults (Poland)                           | Following the introduction of the smoking ban, there were drops in AMI hospitalizations. Short-term changes ranged between -20.6 cases/100,000 among women aged $\geq 65$ years to -0.4 cases/100,000 among women aged 20–64 years.         |    |
| Mortality rate                       | Rodu et al. 2012       | Adults (USA)                              | Following statewide smoking bans, two out five states recorded significant drops in AMI mortality in comparison with earlier projections. A 9% ( $p=0.04$ ) decline in Florida and a 12% ( $p<0.0002$ ) decline in New York.                |    |
| Hospitalization rate                 | Sargent et al. 2004    | All patient (USA)                         | Six months after implementation of a local smoking bans, the number of AMI hospital admissions fell significantly (-16%, 95% CI: -31.7 to -0.3).                                                                                            |    |
| AMI, angina hospitalization rate     | Sargent et al. 2012    | Adults (Germany)                          | The law restricting smoking in the public and hospitality sectors was associated with a 13.3% (95% CI: 8.2 to 18.4) decline in angina pectoris and an 8.6% (95% CI: 5.0 to 12.2) decline in AMI after 1 year.                               |    |
| Hospitalization rate                 | Seo et al. 2007        | Hospital-admitted patients (USA)          | After the implementation of the smoking ban in public places, there was a significant drop in hospital admissions for AMI (-12%; 95% CI: -21.19 to -2.81) among nonsmoking patients.                                                        |   |
| Hospitalization rate, mortality rate | Shetty et al. 2010     | Hospital-admitted patients (USA)          | Smoking bans were not associated with statistically significant short-term declines in neither mortality (-0.3%, 95% CI: -1.6 to 0.9, $p<0.37$ ) nor hospital admissions for AMI or other diseases (-1.5%, 95% CI: -4.8 to 1.8, $p<0.37$ ). |  |
| Hospitalization rate                 | Sims et al. 2010       | Adults (UK)                               | There was a small but significant reduction in the number of emergency admissions for AMI after the implementation of the smoking ban (-2.4%, 95% CI: -4.06 to -0.66, $p=0.007$ ).                                                          |  |
| Hospitalization rate                 | Trachsel et al. 2010   | Admitted patients (Switzerland)           | Post implementation of the smoking ban, the number of AMI patients dropped to 183 ( $p < 0.05$ ), representing a 22% drop in the AMI incidence within the first year of enactment.                                                          |  |
| Hospitalization rate                 | Valentino et al. 2015  | Adults (Switzerland)                      | The mean incidence of STEMI admissions during the 3 pre-ban years (123.7) was significantly higher than the incidence                                                                                                                       |  |



|                                      |                       |                                       |                                                                                                                                                                                                                     |                                                                                       |
|--------------------------------------|-----------------------|---------------------------------------|---------------------------------------------------------------------------------------------------------------------------------------------------------------------------------------------------------------------|---------------------------------------------------------------------------------------|
|                                      |                       |                                       | of admissions in each of the 3 post-ban years (92.9, 101.6 and 89.6 respectively; $p < 0.024$ ).                                                                                                                    |                                                                                       |
| Hospitalization rate                 | Weaver et al. 2018    | Adults (USA)                          | After the enactment of the comprehensive smoke-free air law, monthly AMI admissions significantly declined by 20% (95% CI: 14 to 25) in Marion County and 25% (95% CI: 20 to 29) in Indianapolis.                   |    |
| Hospitalization rate                 | Weg et al. 2012       | Adults (USA)                          | Risk-adjusted hospital admission rates for acute myocardial infarction fell 20%–21% thirty-six months following implementation of new restaurant, bar, and workplace smoking bans.                                  |    |
| <b>Acute Coronary Syndrome (ACS)</b> |                       |                                       |                                                                                                                                                                                                                     |                                                                                       |
| Hospitalization rate                 | Abreu et al. 2017     | Patients (Portugal)                   | There was a significant drop of -5.8% ( $p < 0.001$ ) in the crude rate of ACS hospital admissions after the smoking ban was rolled-out.                                                                            |    |
| Hospitalization rate                 | Cronin et al. 2012    | Adults (Ireland)                      | In the year following implementation of the ban, there was a significant 12% reduction in ACS hospital admissions ( $p = 0.002$ )                                                                                   |    |
| Hospitalization rate                 | Ferrante et al. 2012  | Adults (Argentina)                    | An immediate decrease in ACS admissions was observed after implementation of 100% smoke-free legislation in Santa Fe (-2.5 admissions per 100 000, $p = 0.03$ ; 13% reduction)                                      |    |
| Hospitalization rate                 | Gupta et al. 2011     | Adults (USA)                          | After the smoking ban, there was statistically insignificant rise in ACS hospital admission rates by 0.02% (95% CI: -0.08 to 0.11; $p = 0.12$ ).                                                                    |    |
| Hospitalization rate                 | Pell et al. 2008      | Hospital-admitted patients (Scotland) | Overall, after the enactment of the smoking ban in Scotland, the hospital admission rate for ACS decreased to 17% (95% CI: 16 to 18) compared to only a 4% drop in England which has no such legislation.           |   |
| <b>Coronary Heart Disease (CHD)</b>  |                       |                                       |                                                                                                                                                                                                                     |                                                                                       |
| Hospitalization rate                 | Khuder et al. 2007    | Adults (USA)                          | Hospital admission rates for CHD decreased significantly by 39% (95% CI: 33 to 45) after 1 year and by 47% (95% CI: 41 to 55) after 3 years following the implementation of the smoking ban ( $p = 0.04$ ).         |  |
| CHD, angina prevalence               | Lippert & Gustat 2012 | Adults (USA)                          | Compared to the baseline estimates, seven states/territories recorded significant decreases in prevalence of CHD or angina after implementation of smoking bans. Drops ranged between -1.4 and 0.6% ( $p < 0.01$ ). |  |
| <b>Ischemic Heart disease (IHD)</b>  |                       |                                       |                                                                                                                                                                                                                     |                                                                                       |

|                                              |                      |                                                 |                                                                                                                                                                                                                                                                    |                                                                                       |
|----------------------------------------------|----------------------|-------------------------------------------------|--------------------------------------------------------------------------------------------------------------------------------------------------------------------------------------------------------------------------------------------------------------------|---------------------------------------------------------------------------------------|
| Cerebrovascular disease hospitalization rate | Galán et al. 2015    | NA (Spain)                                      | Following implementation of the Spanish smoking ban, hospital admissions for cerebrovascular disease significantly decreased by 10.2% (95% CI: 3.8 to 16.1) in Barcelona, but not in Madrid.                                                                       |    |
| IHD hospitalization rate                     | Galán et al. 2018    | Adults (Spain)                                  | There was no significant change in hospitalizations for IHD among patients aged ≥18years following implementation of partial (0.1%; 95% CI: -3.6 to 4.0) and comprehensive (-2.6%; 95% CI: -5.6 to 0.5), p>0.05, smoking bans in Spain.                            |    |
| Cerebrovascular disease hospitalization rate | Galán et al. 2018    | Adults (Spain)                                  | Neither partial (1.0%; 95% CI: -2.2 to 4.4) nor comprehensive (-0.8%; 95% CI: -2.9 to 1.4) smoking bans in Spain significantly reduce hospitalizations for cerebrovascular disease among patients ≥18years of age (p>0.05).                                        |    |
| Angina hospitalization rate                  | Gaudreau et al. 2013 | NA (Canada)                                     | After the smoking ban, there was a statistically insignificant change in the mean rate of admissions due to angina of 3.39% (95% CI: -12.85 to 19.63; p=0.68).                                                                                                     |    |
| Stroke hospitalization rate                  | Gaudreau et al. 2013 | NA (Canada)                                     | After the smoking ban, there was a statistically insignificant change in the mean rate of admissions due to stroke of 3.04% (95% CI: -7.06 to 13.14; p=0.56).                                                                                                      |    |
| Angina hospitalization rate                  | Herman & Welsh 2011  | Adults (USA)                                    | After statewide smoking ban implementation, there was a 33% (p=0.014) reduction in hospital admissions for unstable angina. This estimate is based on drops in counties with only a statewide ban in place, compared to those with both statewide and county bans. |    |
| Stroke hospitalization rate                  | Herman & Welsh 2011  | Adults (USA)                                    | After statewide smoking ban implementation, there was a 14% (p=0.014) reduction in hospital admissions for acute stroke. This estimate is based on drops in counties with only a statewide ban in place, compared to those with both statewide and county bans.    |    |
| Stroke incidence rate                        | Mackay et al. 2013   | Patients admitted to acute hospitals (Scotland) | Following smoke-free legislation, there was an 8.90% (95% CI: 4.85 to 12.77, p<0.001) stepwise reduction in cerebral infarction, but no visible effect was observed for other types of stroke.                                                                     |  |
| CVD incidence rate                           | Mayne et al. 2018    | Young adults (USA)                              | Participants living in an area with a restaurant, bar, or workplace smoke-free policy had lower risk of incident cardiovascular disease (HR: 0.75, 95% CI: 0.49 to 1.15; HR: 0.76, 95% CI: 0.47 to 1.24; HR: 0.54, 95% CI: 0.34 to 0.86, respectively).            |  |
| IHD hospitalization rate                     | McGhee et al. 2014   | Adult (Hong Kong)                               | After the introduction of the smoke-free law, the annual proportional change in hospital admissions for IHD in all ages dropped by 9% (95% CI: -13.59 to -4.17, p<0.05).                                                                                           |  |

|                                                        |                            |                                   |                                                                                                                                                                                                                                                                                                                        |                                                                                       |
|--------------------------------------------------------|----------------------------|-----------------------------------|------------------------------------------------------------------------------------------------------------------------------------------------------------------------------------------------------------------------------------------------------------------------------------------------------------------------|---------------------------------------------------------------------------------------|
| CVD, ischemic stroke, AMI, angina hospitalization rate | Naiman et al. 2010         | NA (Canada)                       | After a ban on smoking in restaurants came into effect, there was significant decrease of 39% (95% CI: 38 to 40; p<0.05) in hospital admissions due to cardiovascular conditions. 17% (95% CI: 14 to 19) of the decrease was due to AMI. The drops in ischemic stroke and angina were not statistically significant.   |    |
| Heart rate variability, pulse wave velocity            | Rajkumar et al. 2014       | Hospitality workers (Switzerland) | With the smoking ban, a one cigarette equivalents/day decrease was associated with a 2.3% (95% CI: 0.2, 4.4; p=0.031) higher root mean square of successive differences, a 5.7 % (95% CI: 0.9 to 10.2; p=0.02) higher high frequency component and a 0.72% (95 % CI: 0.40 to 1.05; p<0.001) lower pulse wave velocity. |    |
| CVD, IHD, AMI, respiratory disease mortality rate      | Thach et al. 2016          | NA (China)                        | After the smoking ban in public and workplaces in Hong Kong, there was a significant decline in mortality due to IHD, AMI, CVD, and RD among all ages by 9.3%, 12.6%, 5.7%, and 5.4%, respectively (p<0.05).                                                                                                           |    |
| CVD hospitalization rate                               | Vicedo-Cabrera et al. 2016 | NA (Switzerland)                  | Total hospitalization rates due to CVD did not significantly change (0.02%, CI: -2.71 to 2.82, p= 0.990) after the introduction of the smoking ban in public and workplaces.                                                                                                                                           |    |
| CVD mortality rate                                     | Vicedo-Cabrera et al. 2016 | NA (Switzerland)                  | Total mortality due to CVD did not significantly change (-0.72%, 95% CI: -3.67 to 2.31) after implementation of the smoking ban in public and workplaces.                                                                                                                                                              |    |
| <b>Hypertension</b>                                    |                            |                                   |                                                                                                                                                                                                                                                                                                                        |                                                                                       |
| Hypertension incidence rate                            | Mayne et al 2018           | Adult (USA)                       | Hypertension rate did not significantly decreased after implementation of the smoking ban in bars, restaurants, and workplaces (18%, 7%, and 9% respectively)                                                                                                                                                          |   |
| <b>Lung diseases</b>                                   |                            |                                   |                                                                                                                                                                                                                                                                                                                        |                                                                                       |
| Respiratory symptoms (prevalence)                      | Allwright et al. 2005      | Bar staff (Ireland)               | Among bar staff who did not smoke, self-reported prevalence of any respiratory symptoms significantly declined (-16.7%, 95% CI: -26.1 to -7.3; p=0.001) after legislation for smoke-free workplaces                                                                                                                    |  |
| Respiratory symptoms (prevalence)                      | Ayres et al. 2009          | Bar workers (Scotland)            | Self-reported respiratory symptoms among bar workers significantly reduced one year after their working environment became smoke-free from 69 % to 57% (-12%; p=0.02).                                                                                                                                                 |  |
| Asthma hospitalization rate                            | Bianchi et al. 2011        | Children (Italy)                  | Passage of the smoking ban was associated with a statistically significant decline of 30.7% (95% CI: 22.8 to 38.6) in the hospital admission rates for childhood asthma                                                                                                                                                |  |

|                                         |                      |                                   |                                                                                                                                                                                                                                                                      |                                                                                       |
|-----------------------------------------|----------------------|-----------------------------------|----------------------------------------------------------------------------------------------------------------------------------------------------------------------------------------------------------------------------------------------------------------------|---------------------------------------------------------------------------------------|
| Respiratory symptoms (prevalence)       | Durham et al. 2011   | Hospitality workers (Switzerland) | The prevalence of chest oppression and shortness of breath decreased after the smoking ban (-3.85% and -1.96%, respectively); wheezing showed no change. The decrease in symptoms was, however, not statistically significant.                                       |    |
| Respiratory symptoms (prevalence)       | Eagan et al. 2006    | Hospitality workers (Norway)      | Among non- and former-smokers, there were significant declines in reports of any respiratory symptoms (-11.9% and 33.3%, respectively, p<0.001) after the public smoking ban was passed.                                                                             |    |
| Respiratory symptoms (prevalence)       | Eisner et al. 1998   | Bartenders (USA)                  | After the smoking ban, the self-reported prevalence of any respiratory symptom significantly reduced among bartenders (-42%; p<0.001)                                                                                                                                |    |
| Respiratory symptoms (prevalence)       | Farrelly et al. 2005 | Hospitality workers (USA)         | After the smoking ban, there was no significant change in the prevalence of overall respiratory symptoms (-37%; p=0.117).                                                                                                                                            |    |
| COPD hospitalization rate               | Galán et al. 2015    | NA (Spain)                        | In Barcelona, hospital admissions for COPD were significantly reduced by 16% (95% CI: 7.0 to 24.1) following adoption of the smoking ban.                                                                                                                            |    |
| Asthma hospitalization rate             | Galán et al. 2015    | NA (Spain)                        | In Barcelona, a 15.4% (95% CI: 8.4 to 34) drop in hospital admissions for asthma following adoption of the smoking ban was not statistically significant.                                                                                                            |    |
| COPD hospitalization rate               | Galán et al. 2017    | Adults (Spain)                    | The partial smoking ban was associated with an immediate drop of -14.7% (95% CI: -23.4 to -5.0) in COPD-related admissions, and was sustained over one-year (-13.6%; 95% CI: -23.1 to -2.9). The comprehensive ban showed no effect.                                 |    |
| Asthma hospitalization rate             | Galán et al. 2017    | Adults (Spain)                    | There was no immediate significant change in hospitalizations for asthma following implementation of partial (12.1%; 95% CI: -3.2 to 29.8) and comprehensive (-7.4%; 95% CI: -14.2 to -0.2) smoking bans. Long-term effects were also not statistically significant. |    |
| COPD hospitalization rate               | Gaudreau et al. 2013 | NA (Canada)                       | After the smoking ban, the mean rate of admissions due to COPD significantly decreased by 6.6% (95% CI: -10.64 to 23.97; p=0.45).                                                                                                                                    |  |
| Asthma hospitalization rate (pediatric) | Gaudreau et al. 2013 | NA (Canada)                       | After the smoking ban, a recorded increase of 1.11% (95% CI: 0.63 to 1.95; p=0.71) in the mean rate of admissions due to pediatric asthma was not statistically significant.                                                                                         |  |
| Asthma hospitalization rate (adult)     | Gaudreau et al. 2013 | NA (Canada)                       | After the smoking ban, a recorded increase of 1.48% (95% CI: 0.90 to 2.41; p=0.12) in the mean rate of admissions due to adult asthma was not statistically significant.                                                                                             |  |
| Respiratory symptoms (prevalence)       | Goodman et al. 2007  | Bar workers (Ireland)             | There were significant reductions in self-reported respiratory symptoms after the smoking ban (-28%, p<0.01).                                                                                                                                                        |  |

|                                                               |                       |                                    |                                                                                                                                                                                                                                                                     |                                                                                       |
|---------------------------------------------------------------|-----------------------|------------------------------------|---------------------------------------------------------------------------------------------------------------------------------------------------------------------------------------------------------------------------------------------------------------------|---------------------------------------------------------------------------------------|
| Asthma hospitalization rate                                   | Herman & Welsh 2011   | Adults (USA)                       | After statewide smoking ban implementation, there was a 22% ( $p<0.001$ ) reduction in hospital admissions for acute asthma. This estimate is based on drops in counties with only a statewide ban in place, compared to those with both statewide and county bans. |    |
| Respiratory symptoms (prevalence)                             | Kim et al. 2015       | Restaurant and pub workers (Korea) | Self-reported prevalence of respiratory symptoms did not significantly differ among staff in Korean restaurants and pubs before and after the smoking ban ( $p>0.05$ ).                                                                                             |    |
| Asthma discharge rate                                         | Landers 2014          | Adult and Children (USA)           | After the implementation of county smoke-free laws, reductions of asthma discharges were statistically significant (For Adult: $b = -2.44$ ; $p<0.05$ ; For Child: $b = -1.32$ ; $p<0.05$ )                                                                         |    |
| Asthma discharge rate                                         | Landers 2014          | Adult and Children (USA)           | After the implementation of state smoke-free laws, reductions in asthma discharges were not statistically significant (For Adult: $b = 0.29$ ; $p>0.05$ ; For Child: $b = 0.12$ ; $p>0.05$ ).                                                                       |    |
| Lower respiratory tract infection (LRTI) hospitalization rate | Lee 2016              | Children (Hong Kong)               | Implementation of comprehensive smoke-free legislation was associated with a significant reduction in hospital admissions for childhood LRTI (immediate effect: -33.5%; 95% CI: -36.4 to -30.5; trend effect: -13.9%; 95% CI: -16.0 to -11.7).                      |    |
| Respiratory symptoms (prevalence)                             | Li et al. 2013        | Occupational employees (China)     | After the smoking ban, there was an overall statistically significant decrease in the prevalence of all respiratory symptoms ( $p<0.05$ ). Drops ranged between -8.8% ( $p<0.01$ ) for phlegm and 2.5% ( $p<0.05$ ) for morning cough.                              |    |
| Respiratory symptoms (prevalence)                             | MacCalman et al. 2012 | Bar workers (UK)                   | There was a 15% and 23% reduction in any respiratory symptoms among bar workers after the implementation of smoke-free legislation in England and Scotland, respectively, ( $p<0.05$ ).                                                                             |    |
| Asthma hospitalization rate                                   | Mackay et al. 2010    | Admitted children (Scotland)       | The introduction of a comprehensive smoke-free legislation in all wholly or partially enclosed public spaces was associated with significant reductions in preterm delivery (-11.72%; 95% CI: -15.87 to -7.35; $p<0.001$ ).                                         |  |
| Respiratory symptoms (prevalence)                             | Madureira et al. 2014 | Restaurant workers (Portugal)      | There was a significant marked reduction in nasal problems (-88%, $p<0.01$ ), sore or dry throat, cough, and wheezing (-89%, $p=0.07$ ) after the implementation of the smoking ban.                                                                                |  |
| Sudden infant death syndrome (SIDS) incidence rate            | Markowitz 2008        | NA (USA)                           | Estimated effect by number of bans shows that each additional smoking ban is associated with an average reduction of 1.46 SIDS deaths.                                                                                                                              |  |
| Respiratory problems hospitalization rate                     | McGhee et al. 2014    | Adults (Hong Kong)                 | After the introduction of the smoke-free law, the annual proportional change in hospital admissions for respiratory problems for all ages increased by 2.55% (95% CI: 0.01 to 5.16; $p<0.05$ ).                                                                     |  |

|                                                                      |                            |                    |                                                                                                                                                                                                                                                                      |                                                                                       |
|----------------------------------------------------------------------|----------------------------|--------------------|----------------------------------------------------------------------------------------------------------------------------------------------------------------------------------------------------------------------------------------------------------------------|---------------------------------------------------------------------------------------|
| Lung cancer hospitalization rate                                     | McGhee et al. 2014         | Adult (Hong Kong)  | After the introduction of the smoke-free law, the annual proportional change in hospital admissions for lung cancer for all ages increased by 14.33% (95% CI: 5.81 to 23.53; p<0.05).                                                                                |    |
| Lung cancer mortality rate                                           | McGhee et al. 2014         | Adult (Hong Kong)  | For lung cancer mortality, there was an immediate rate drop of -5.7% (95% CI: -9.73 to -1.39; p<0.05) after the smoking ban.                                                                                                                                         |    |
| Respiratory symptoms (prevalence)                                    | Menzies et al. 2006        | Adults (Scotland)  | The percentage of bar workers with respiratory symptoms decreased from 79.2% before the smoke-free policy to 53.2% after the ban (total change, -26%; 95% CI: -13.8 to -38.1; p<0.001).                                                                              |    |
| Respiratory conditions (COPD, lung infection) hospitalization rate   | Naiman et al. 2010         | NA (Canada)        | After a ban on smoking in restaurants came into effect, there was significant decrease of 33% (95% CI: 32 to 34; p<0.05) in hospital admissions due to respiratory conditions.                                                                                       |    |
| Respiratory symptoms (prevalence)                                    | Schoj et al. 2010          | Adults (Argentina) | After the enactment of the 100% smoke-free law in the hospitality sector, there was a reduction in respiratory symptoms, from a pre-ban level of 57.5% to a post-ban level of 28.8% (p<0.001).                                                                       |    |
| Lung cancer, cerebrovascular disease mortality rate                  | Thach et al. 2016          | NA (China)         | After the smoking ban in public and workplaces in Hong Kong, there was no significant decline in mortality due to cerebrovascular disease (-3.4%; 95% CI: -8.4 to 1.8) and lung cancer (-3.4%; 95% CI: -8.2 to 1.8).                                                 |    |
| Respiratory diseases (COPD, asthma, pneumonia) hospitalization rate  | Vicedo-Cabrera et al. 2016 | NA (Switzerland)   | Total hospitalization rates due to respiratory diseases did not significantly change (0.03%; 95% CI: -5.67 to 6.06; p= 0.993) after the introduction of the smoking ban in public and workplaces.                                                                    |    |
| Respiratory diseases mortality rate                                  | Vicedo-Cabrera et al. 2016 | NA (Switzerland)   | Total mortality due to respiratory diseases significantly decreased (-8.2%; 95% CI: -15.2 to -0.6; p<0.03) after the implementation of the smoking ban in public and workplaces.                                                                                     |   |
| Hospitalization rate                                                 | Weg et al. 2012            | Adults (USA)       | Admission rates for COPD fell 11% where workplace smoking bans were in place and 15% where bar smoking bans were present.                                                                                                                                            |  |
| Respiratory symptoms (prevalence)                                    | Wilson et al. 2012         | Adults (USA)       | After the adoption Michigan's Dr. Ron Davis smoke-free air law, there were significant decreases in respiratory symptoms. These ranged between -1 point (p<0.001) for allergic symptoms to -0.2 point (p<0.05) for wheezing based on a five-point likert-type scale. |  |
| Bronchitis, lower respiratory tract infections emergency visits rate | Yildiz et al. 2014         | NA (Turkey)        | Emergency admissions decreased significantly by 39.8% (p<0.05) for bronchitis and 4.4% (p<0.01) for lower respiratory tract infections after the enactment of smoke-free legislation.                                                                                |  |
| COPD, myocardial infarction emergency visits rate                    | Yildiz et al. 2014         | NA (Turkey)        | A 21.2% and 2.4% decrease recorded in emergency unit admissions due to COPD and myocardial infarction,                                                                                                                                                               |  |

|                                                                                                                            |                          |                                     |                                                                                                                                                                                                                                                                                                                                                 |                                                                                       |
|----------------------------------------------------------------------------------------------------------------------------|--------------------------|-------------------------------------|-------------------------------------------------------------------------------------------------------------------------------------------------------------------------------------------------------------------------------------------------------------------------------------------------------------------------------------------------|---------------------------------------------------------------------------------------|
|                                                                                                                            |                          |                                     | respectively, after a legislation banning smoking in all indoor public places was not statistically significant ( $p>0.05$ ).                                                                                                                                                                                                                   |                                                                                       |
| Asthma emergency visits rate                                                                                               | Yildiz et al. 2015       | NA (Turkey)                         | After a legislation banning smoking in all indoor public places, a 16.0% increase in emergency unit admissions due to asthma was not statistically significant ( $p>0.05$ ).                                                                                                                                                                    |    |
| <b>Birth outcomes</b>                                                                                                      |                          |                                     |                                                                                                                                                                                                                                                                                                                                                 |                                                                                       |
| Birth weight (mean), low birth weight, very low birth weight prevalence                                                    | Amaral 2009              | Infants (USA)                       | Estimated changes in birth weight, low birth weight, very low birth weight of -0.34 grams, 0.06 percentage points (%p), and -0.04 %p, respectively, after local smoking bans, and 2.78 grams, 0.04 %p, and -0.03 %p, respectively, after statewide smoking bans were not statistically significant ( $p>0.05$ ).                                |    |
| Low birth weight, very low birth weight prevalence                                                                         | Bakolis et al. 2016      | Pregnant women (UK)                 | The risk of low birth weight decreased between 8% (95% CI: 4 to 12) and 14% (95% CI: 5 to 23), and very low birth weight between 28% (95% CI: 19 to 36) and 32% (95% CI: 21 to 41) following the introduction of the smoke-free legislation in England, for those entering their third trimester.                                               |    |
| Birth weight (mean), low birth weight, very low birth weight, preterm birth prevalence                                     | Bharadwaj et al. 2014    | Female hospitality workers (Norway) | Children of female workers in restaurants and bars born after the smoking ban saw significantly lower rates (1.8 percentage point (%p); $p<0.05$ ) of babies born below the very low birth weight threshold. Changes in birth weight (+54.9 grams), low birth weight (+0.01 %p), and preterm birth (+2.5 %p) was not statistically significant. |    |
| Birth weight (mean), low birth weight, very low birth weight prevalence                                                    | Gao & Baughman 2017      | NA (USA)                            | Smoking bans were not associated with small improvements in low birth weight for babies born to mothers aged 20–24 years (1.46%) and very low birth weight for babies born to mothers aged 14–19 years (4.94%) and 20–24 years (2.52%), $p<0.05$ . Effects on birth weight were not statistically significant.                                  |    |
| Birth weight, low birth weight, very low birth weight, preterm birth, very preterm birth prevalence, infant mortality rate | Hajdu & Hajdu 2018       | Mothers (Hungary)                   | Following the smoking ban, mean birth weight of newborns increased by 1.7% or 55.5g, while low birth weight, very low birth weight, preterm birth, very preterm birth and infant mortality rate decreased by 2.2 percentage point (%p), 1.2 %p, 1.9 %p, 0.9 %p and 0.5 %p, respectively ( $p<0.05$ ).                                           |  |
| Low birth weight, very low birth weight, preterm birth prevalence                                                          | Hankins & Tarasenko 2016 | NA (USA)                            | Smoking bans had no statistically significant effects either birth outcomes. Among smoking mothers, slight decreases were seen in low birth weight for restaurant bans (-0.05%), in very low birth weight for workplace bans (-0.02%), and preterm births (-0.21%), $p>0.05$ . Nonsmoking mothers                                               |  |



|                                                                                                                                                                               |                        |                                           |                                                                                                                                                                                                                                                                                                                                                                                                         |                                                                                       |
|-------------------------------------------------------------------------------------------------------------------------------------------------------------------------------|------------------------|-------------------------------------------|---------------------------------------------------------------------------------------------------------------------------------------------------------------------------------------------------------------------------------------------------------------------------------------------------------------------------------------------------------------------------------------------------------|---------------------------------------------------------------------------------------|
|                                                                                                                                                                               |                        |                                           | recorded decreases in very low birth weight for workplace bans (-0.01%) and preterm births (-0.02%), $p>0.05$ .                                                                                                                                                                                                                                                                                         |                                                                                       |
| Birth weight, low birth weight, preterm birth, small for gestational age                                                                                                      | Hawkins et al. 2014    | Mothers (USA)                             | Smoke-free restaurant legislation was not associated with adverse birth outcomes.                                                                                                                                                                                                                                                                                                                       |    |
| Birth defect, Cleft lip with or without cleft palate, cleft palate alone, limb reduction defect, cyanotic congenital heart disease, gastroschisis, or any other birth defects | Hawkins and Baum, 2019 | Mothers (USA)                             | Enactment of smoke-free legislation was not associated with birth defects ( $p>0.05$ ).                                                                                                                                                                                                                                                                                                                 |    |
| Birth weight, low birth weight, preterm birth, small for gestational age                                                                                                      | Hawkins and Baum, 2019 | Mothers (USA)                             | No evidence was found for associations between the enactment of smoke-free legislation and all birth outcomes, except preterm birth, such that smoke-free legislation was associated with a 5.60 percentage point increase in preterm birth (3.70, 7.50; $p<0.01$ ).                                                                                                                                    |    |
| Infant, neonatal mortality rate                                                                                                                                               | Hone et al. 2020       | Infant (Brazil)                           | Comprehensive smoke-free legislation implementation was associated with -5.2 % (95% CI: -8.3 to -2.1, $p<0.001$ ) and -3.4 % (95% CI: -6.7 to -0.1, $p<0.05$ ) step reductions in infant and neonatal mortality, respectively.                                                                                                                                                                          |    |
| Small-for-gestational-age (SGA) prevalence                                                                                                                                    | Kabir et al. 2013      | Women with singleton livebirths (Ireland) | There was a significant immediate decline in SGA rates after the smoking ban (-0.45%; 95% CI: -0.7 to -0.19, $p<0.0007$ ), which was sustained over time with a gradual effects estimated at -0.02% ( $p<0.0001$ ).                                                                                                                                                                                     |    |
| Preterm delivery, small for gestational age                                                                                                                                   | Mackay et al. 2012     | Women with singleton births (Scotland)    | Three months prior to the legislation, there were significant decreases in small for gestational age (-4.52%, 95% CI= -8.28, -0.60, $p=0.024$ ) and overall preterm delivery (-11.72%, 95% CI= -15.87, -7.35, $p<0.001$ ).                                                                                                                                                                              |   |
| Birth weight (mean), small-for-gestational-age (SGA), premature birth prevalence                                                                                              | Mallma et al. 2020     | Women with singleton births (Peru)        | After implementation of the tobacco control laws, there statistically significant reduction in prevalence of premature births by 30 cases per 10,000 live births. Decreases of -3.10 grams in birthweight and 6 cases per 10,000 live births in SGA were statistically insignificant.                                                                                                                   |  |
| Birth weight (mean), low birth weight, very low birth weight prevalence                                                                                                       | Markowitz et al. 2013  | Women with singleton births (USA)         | Complete smoking bans in restaurant showed no statistically significant effects on birth outcomes. There were increases ranging between 2.8 and 6.6 %p for birth weight, slight drops between -0.3 and -0.4 %p for low birth weight, and 0.1 %p each for very low birth weight among women aged $\geq 20$ years ( $p>0.05$ ). All indicators moved in the adverse direction for women aged $<20$ years. |  |



|                                                                             |                            |                                |                                                                                                                                                                                                                                                                                                                       |                                                                                     |
|-----------------------------------------------------------------------------|----------------------------|--------------------------------|-----------------------------------------------------------------------------------------------------------------------------------------------------------------------------------------------------------------------------------------------------------------------------------------------------------------------|-------------------------------------------------------------------------------------|
| Preterm birth, low birth weight prevalence, small-for-gestational-age (SGA) | Simón et al. 2017          | Mothers (Spain)                | Comprehensive smoking ban was associated with immediate and one year after implementation reductions in preterm birth (4.5% vs 4.1%) and low birth weight (2.3% vs 3.5%) rates. Partial smoking ban reduced SGA immediately (4.9%) and one year post-implementation (4.2%).                                           |  |
| Preterm, early-term births prevalence                                       | Vicedo-Cabrera et al. 2016 | Newborn Children (Switzerland) | After the implementation of the smoking ban in public places and workplaces in Switzerland, the risk of preterm birth and early term birth was significantly reduced [preterm birth: -3.6% (95% CI: -9.3 to 2.5); early-term birth: -5.0% (95% CI: -7.5 to -2.5)].                                                    |  |
| <b>Health status</b>                                                        |                            |                                |                                                                                                                                                                                                                                                                                                                       |                                                                                     |
| Self-reported health status                                                 | Shelley et al. 2007        | Adult Chinese American (USA)   | Smokers who live under a total household smoking ban only or both a total household and total workplace ban were, respectively, 1.90 (CI: 0.99 to 3.67, p<0.05) and 2.61 (CI: 1.22 to 4.08, p<0.01) times more likely to report better health status compared with those who reported no smoking ban at work or home. |  |

Policy: Smoke-free legislations = “clean indoor air acts”, i.e., laws banning restricting smoking in shared spaces such as public place, workplace, restaurants, bars  
Outcomes: AMI, Acute Myocardial Infarction; ACS, Acute Coronary Syndrome; IHD, Ischemic Heart Disease; CVD, Cardiovascular disease; STEMI, ST-elevation myocardial infarctions; COPD, Chronic Obstructive Pulmonary Disease; LBW, Low birth weight; VLBW, Very low birth weight; SGA, Small-for-gestational-age  
Metrics: CI, confidence interval; IRR, Incidence Rate Ratio; OR, odds ratio; RR, risk ratio/relative risk

Note:

Green: Positive effect of tobacco policy, i.e., statistically significant increase or decrease in targeted outcome favoring the policy

Red: Negative effect of tobacco policy, i.e., statistically significant increase or decrease in targeted outcome favoring control

Grey: No effect of tobacco policy, i.e., statistically non-significant increase or decrease in targeted outcome

**eTable 12.** Narrative Summary of Adverse Health Outcomes Following the Implementation of Tobacco Law<sup>1</sup>

| Outcome                                                                                                                                    | Study                    | Participants (Country)                 | Impact                                                                                                                                                                                                                                                                                                                                      | Conclusion                                                                            |
|--------------------------------------------------------------------------------------------------------------------------------------------|--------------------------|----------------------------------------|---------------------------------------------------------------------------------------------------------------------------------------------------------------------------------------------------------------------------------------------------------------------------------------------------------------------------------------------|---------------------------------------------------------------------------------------|
| <b>Mortality</b>                                                                                                                           |                          |                                        |                                                                                                                                                                                                                                                                                                                                             |                                                                                       |
| Smoking-attributable mortality rate                                                                                                        | Holford et al. 2014      | NA (USA)                               | Estimated smoking-attributable deaths were reduced after tobacco control measures <sup>1</sup> (-31%; 95% CI: -32 to -29).                                                                                                                                                                                                                  |    |
| Cancer mortality rate                                                                                                                      | Jiang et al. 2019        | Youth and adults (Australia)           | The release of UK and US public health reports on tobacco in 1962 and 1964 and the ban on cigarette ads on TV and radio in 1976 were found to have been associated with a reduction in mortality from all cancer types except liver cancer.                                                                                                 |    |
| <b>Heart Diseases</b>                                                                                                                      |                          |                                        |                                                                                                                                                                                                                                                                                                                                             |                                                                                       |
| CVD hospitalization rate                                                                                                                   | Wu et al. 2021           | Adults (China)                         | Hospital admission rates for all CVDs decreased significantly, immediately after implementing the comprehensive tobacco policy <sup>2</sup> , (-4%; 95% CI: -5.3 to -2.7).                                                                                                                                                                  |    |
| <b>Lung Diseases</b>                                                                                                                       |                          |                                        |                                                                                                                                                                                                                                                                                                                                             |                                                                                       |
| Lung cancer                                                                                                                                | Barnoya and Glantz, 2004 | NA (USA)                               | A comprehensive tobacco control program is associated with a lower incidence of lung cancer (p=0.001).                                                                                                                                                                                                                                      |    |
| <b>Birth Outcomes</b>                                                                                                                      |                          |                                        |                                                                                                                                                                                                                                                                                                                                             |                                                                                       |
| Small-for-gestational age (SGA) prevalence                                                                                                 | Peelen et al. 2016       | Infant (singleton birth) (Netherlands) | The smoking ban in bars and restaurants, mass media campaign, and tobacco tax increase was associated with a statistically significant decrease in SGA (-4.4%; 95% CI: -2.4 to -6.4; p<0.001)                                                                                                                                               |    |
| Perinatal mortality rate, preterm birth, stillbirth, early neonatal mortality, very preterm birth, low birth weight, very low birth weight | Peelen et al. 2016       | Infant (singleton birth) (Netherlands) | The 2004 and 2008 policies of the smoking ban in workplaces, mass media campaigns, and tobacco tax increase were not associated with statistically significant changes in the odds of developing perinatal mortality, preterm birth, stillbirth, early neonatal mortality, very preterm birth, low birth weight, and very low birth weight. |  |

<sup>1</sup>Tobacco control measures include—education on smoking’s dangers, increases in cigarette taxes, smoke-free air laws, media campaigns, marketing, and sales restrictions, lawsuits, and cessation treatment programs

<sup>2</sup>Comprehensive tobacco policy package: combining a complete ban on smoking in indoor public places, cessation support, more comprehensive bans on advertising, and tax rises  
Outcomes: CVD, Cardiovascular disease; SGA, Small-for-gestational-age. Metrics: CI, confidence interval

Note:

Green: Positive effect of tobacco policy, i.e., statistically significant increase or decrease in targeted outcome favoring the policy

Red: Negative effect of tobacco policy, i.e., statistically significant increase or decrease in targeted outcome favoring control

Grey: No effect of tobacco policy, i.e., statistically non-significant increase or decrease in targeted outcome

**eTable 13.** Narrative Summary of Adverse Health Outcomes Following the Implementation of an Increase in Cigarette Prices or Cigarette Taxes

| Outcome                                                                                                                                                                       | Study                  | Participants (Country)            | Impact                                                                                                                                                                                                                                                                                                                                           | Conclusion                                                                            |
|-------------------------------------------------------------------------------------------------------------------------------------------------------------------------------|------------------------|-----------------------------------|--------------------------------------------------------------------------------------------------------------------------------------------------------------------------------------------------------------------------------------------------------------------------------------------------------------------------------------------------|---------------------------------------------------------------------------------------|
| <b>Lung and heart diseases</b>                                                                                                                                                |                        |                                   |                                                                                                                                                                                                                                                                                                                                                  |                                                                                       |
| Sudden infant death syndrome (SIDS) prevalence                                                                                                                                | Markowitz 2008         | NA (USA)                          | Higher cigarette prices and state excise taxes are negatively and significantly associated with a reduction in SIDS deaths. A 10% increase in the real price of cigarettes reduces SIDS deaths by 6.7%-7.4%. Every 10% increase in the real taxes on cigarettes reduces SIDS deaths by 1.56%-1.79%.                                              |    |
| AMI, asthma, sudden cardiac death (SCD) hospitalization rate                                                                                                                  | Ma et al. 2013         | Adult (USA)                       | An increase in the price of cigarettes to more than \$4 per 20-cigarette pack was associated with a significant decrease in age-adjusted asthma hospitalization (p<0.001) and age-adjusted AMI hospitalization (p<0.05), and SCD rates (p=0.001).                                                                                                |    |
| <b>Birth outcome</b>                                                                                                                                                          |                        |                                   |                                                                                                                                                                                                                                                                                                                                                  |                                                                                       |
| Birth weight (mean)                                                                                                                                                           | Evans and Ringel, 1999 | Women with live births (USA)      | A one-cent increase in the state tax rate on cigarettes increases average birth weight by 0.16 g (p<0.05).                                                                                                                                                                                                                                       |    |
| Birth weight, low birth weight, preterm birth, small for gestational age                                                                                                      | Hawkins et al. 2014    | Mothers (USA)                     | Increases in cigarette taxes were associated with increased birth weight and a reduced number of adverse birth outcomes (low birth weight, preterm birth and small for gestational age).                                                                                                                                                         |    |
| Birth defect, Cleft lip with or without cleft palate, cleft palate alone, limb reduction defect, cyanotic congenital heart disease, gastroschisis, or any other birth defects | Hawkins and Baum, 2019 | Mothers (USA)                     | Every \$1.00 increase in cigarette taxes reduced the risk of infants having any birth defect by 0.0023 percentage points (p=0.02) and also reduced the risks of cyanotic heart defects (p=0.04), cleft palate (p=0.04), gastroschisis (p=0.02), and limb reduction (p=0.02).                                                                     |    |
| Birth weight, low birth weight, preterm birth, small for gestational age                                                                                                      | Hawkins and Baum, 2019 | Mothers (USA)                     | Among white mothers, every \$1.00 increase in cigarette taxes increased their infants' birth weight by 4.19 g (p=0.003) and decreased the likelihood of having a baby born low birth weight by -0.05 percentage points (p=0.01), preterm by -0.04 percentage points (p=0.02), or small for gestational age by -0.18 percentage points (p=0.008). |  |
| Birth weight (mean), Low birth weight, Very low birth weight prevalence                                                                                                       | Markowitz et al. 2013  | Women with singleton births (USA) | Cigarettes taxes showed no statistically significant effects on birth outcomes. With each \$1 increase in the real tax on cigarettes, there were increases ranging between 1.0 and 5.0 %p for birth weight, drops between -0.1 and -0.6 %p for low birth weight, and between -0.2 and -0.3 %p for very low birth weight among women aged <20     |  |

|                                                  |                       |              |                                                                                                                                                |                                                                                     |
|--------------------------------------------------|-----------------------|--------------|------------------------------------------------------------------------------------------------------------------------------------------------|-------------------------------------------------------------------------------------|
|                                                  |                       |              | to 34 years ( $p>0.05$ ). All indicators moved in the adverse direction for women aged $\geq 35$ years.                                        |                                                                                     |
| Infant mortality rate                            | Patrick et al. 2016   | Infant (USA) | With every \$1 increase in cigarette price per pack, there was an overall change in infant mortality rates of -0.19% (95% CI: -0.30 to -0.09). |  |
| Fetal deaths, low birth weight, infant mortality | Sen and Pierard, 2011 | NA (Canada)  | Higher taxes are significantly correlated with lower infant mortalities and higher fetal deaths.                                               |  |

Outcomes: SIDS, Sudden Infant Death Syndrome; Asthma, SCD, Sudden cardiac death. Metrics: CI, confidence interval

Note:

Green: Positive effect of tobacco policy, i.e., statistically significant increase or decrease in targeted outcome favoring the policy

Red: Negative effect of tobacco policy, i.e., statistically significant increase or decrease in targeted outcome favoring control

Grey: No effect of tobacco policy, i.e., statistically non-significant increase or decrease in targeted outcome

**eTable 14.** Narrative Summary of Adverse Health Outcomes Following the Implementation of Miscellaneous Policies

| Outcome                                                        | Study                 | Participants (Country)                                | Impact                                                                                                                                                                                                                                                                                                                    | Conclusion                                                                           |
|----------------------------------------------------------------|-----------------------|-------------------------------------------------------|---------------------------------------------------------------------------------------------------------------------------------------------------------------------------------------------------------------------------------------------------------------------------------------------------------------------------|--------------------------------------------------------------------------------------|
| <b>Minimum Cigarette Purchase Age</b>                          |                       |                                                       |                                                                                                                                                                                                                                                                                                                           |                                                                                      |
| <b>Birth outcome</b>                                           |                       |                                                       |                                                                                                                                                                                                                                                                                                                           |                                                                                      |
| Birth weight (mean), low birth weight, preterm birth incidence | Yan 2014              | Women who conceived between ages 19 to 21 years (USA) | Pregnant women subject to the minimum cigarette purchase age of 21 years (MCPA 21) policy were 1.5 percentage points (%p) ( $p < 0.05$ ) less likely to have low birth weight babies. Increases in birth weight of 11.4 gram and preterm terms of 1.2 %p given MCPA 21 were not statistically significant ( $p > 0.05$ ). |   |
| <b>Nicotine Replacement Therapy (NRT)</b>                      |                       |                                                       |                                                                                                                                                                                                                                                                                                                           |                                                                                      |
| <b>Birth outcome</b>                                           |                       |                                                       |                                                                                                                                                                                                                                                                                                                           |                                                                                      |
| Birth weight, gestational age at delivery                      | Adams et al. 2013     | Women with live births (USA)                          | Coverage for NRT, medications and cessation counseling during pregnancy was associated with a small increase ( $< 1$ day) in infant gestation ( $p < 0.05$ ).                                                                                                                                                             |   |
| Preterm birth, small for gestational age                       | Jarlenski et al. 2014 | Mothers (USA)                                         | The comprehensive smoking cessation coverage of pharmacotherapy (any form of NRT or bupropion for smoking cessation) and counseling did not have a significant effect on the probability of having a preterm birth or an infant small for gestational age.                                                                |   |
| <b>Tobacco Retailer Density</b>                                |                       |                                                       |                                                                                                                                                                                                                                                                                                                           |                                                                                      |
| <b>Lung Diseases</b>                                           |                       |                                                       |                                                                                                                                                                                                                                                                                                                           |                                                                                      |
| COPD-related inpatient hospital discharge outcomes             | Kong et al. 2021      | NA (USA)                                              | Higher retailer density was associated with a 19% (IRR=1.19; 95% CI=1.12–1.27) higher COPD-related hospital discharge rate and 30% (IRR=1.30; 95% CI=1.21–1.39) higher total COPD-related hospital costs per population.                                                                                                  |  |

Note: Outcome: COPD, Chronic Obstructive Pulmonary Disease

Green: Positive effect of tobacco policy, i.e., statistically significant increase or decrease in targeted outcome favoring the policy

Red: Negative effect of tobacco policy, i.e., statistically significant increase or decrease in targeted outcome favoring control

Grey: No effect of tobacco policy, i.e., statistically non-significant increase or decrease in targeted outcome.

After implementation of free/discounted nicotine replacement therapy, 1 out of 2 studies reported a significant improvement in birth outcomes. The only study evaluating the impact of the minimum cigarette purchase age law found that it was associated with a lower prevalence of low birth weight, while another study evaluating the impact of tobacco retailer density found that higher retailer density was associated with higher discharge rates for chronic obstructive pulmonary disease (COPD)

## eReferences

1. Wells G SB, O'Connell D, Peterson J, Welch V, Losos M, et al. The Newcastle-Ottawa Scale (NOS) for assessing the quality of nonrandomised studies in meta-analyses. [https://www.ohrica/programs/clinical\\_epidemiology/oxfordasp](https://www.ohrica/programs/clinical_epidemiology/oxfordasp) 2015.
2. Effective Practice and Organization of Care (EPOC): EPOC resources for review authors. <https://epocochraneorg/resources/epoc-resources-review-authors>.
3. Abe TMO, Scholz J, de Masi E, Nobre MRC, Filho RK. Decrease in mortality rate and hospital admissions for acute myocardial infarction after the enactment of the smoking ban law in São Paulo city, Brazil. *Tob Control*. 2017; **26**(6): 656-662.
4. Abreu D, Sousa P, Matias-Dias C, Pinto FJ. Longitudinal Impact of the Smoking Ban Legislation in Acute Coronary Syndrome Admissions. *Biomed Res Int*. 2017; **2017**: 6956941.
5. Adams EK, Markowitz S, Dietz PM, Tong VT. Expansion of Medicaid covered smoking cessation services: maternal smoking and birth outcomes. *Medicare Medicaid Res Rev*. 2013; **3**(3).
6. Agüero F, Degano IR, Subirana I, et al. Impact of a partial smoke-free legislation on myocardial infarction incidence, mortality and case-fatality in a population-based registry: the REGICOR Study. *PLoS One*. 2013; **8**(1): e53722.
7. Allwright S, Paul G, Greiner B, et al. Legislation for smoke-free workplaces and health of bar workers in Ireland: before and after study. *BMJ*. 2005; **331**(7525): 1117.
8. Alsever RN, Thomas, W. M., Nevin-Woods, C et al. Reduced hospitalizations for acute myocardial infarction after implementation of a smoke-free ordinance--City of Pueblo, Colorado, 2002-2006. *MMWR Morb Mortal Wkly Rep*. 2009; **57**(51): 1373-1373.
9. Amaral M. The effect of local smoking ordinances on fetal development: evidence from California. Accessed June 2, 2023.
10. Ayres JG, Semple S, MacCalman L, et al. Bar workers' health and environmental tobacco smoke exposure (BHETSE): symptomatic improvement in bar staff following smoke-free legislation in Scotland. *Occup Environ Med*. 2009; **66**(5): 339-346.
11. Bakolis I, Kelly R, Fecht D, et al. Protective effects of smoke-free legislation on birth outcomes in England: A regression discontinuity design. *Epidemiology*. 2016; **27**(6): 810-818.
12. Bannon F, Devlin A, McElwee G, Gavin A. Greater gains from smoke-free legislation for non-smoking bar staff in Belfast. *Eur J of Public Health*. 2009; **19**(6): 638-643.
13. Barnett R, Pearce J, Moon G, Elliott J, Barnett P. Assessing the effects of the introduction of the New Zealand Smokefree Environment Act 2003 on acute myocardial infarction hospital admissions in Christchurch, New Zealand. *Aust N Z J Public Health*. 2009; **33**(6): 515-520.
14. Barnoya J, Glantz S. Association of the California tobacco control program with declines in lung cancer incidence. *Cancer causes & control : CCC* 2004; **15**(7): 689-95.
15. Barone-Adesi F, Vizzini L, Merletti F, Richiardi L. Short-term effects of Italian smoking regulation on rates of hospital admission for acute myocardial infarction. *Eur Heart J*. 2006; **27**(20): 2468-2472.
16. Barone-Adesi F, Gasparrini A, Vizzini L, Merletti F, Richiardi L. Effects of Italian smoking regulation on rates of hospital admission for acute coronary events: a country-wide study. *PLoS One* 2011; **6**(3): e17419.
17. Barr CD, Diez DM, Wang Y, Dominici F, Samet JM. Comprehensive smoking bans and acute myocardial infarction among Medicare enrollees in 387 US counties: 1999-2008. *Am J Epidemiol*. 2012; **176**(7): 642-648.
18. Barrio G, Belza MJ, Carmona R, Hoyos J, Ronda E, Regidor E. The limits of single-group interrupted time series analysis in assessing the impact of smoke-free laws on short-term mortality. *Int J Drug Policy*. 2019; **73**: 112-120.

19. Bartecchi C, Alsever RN, Nevin-Woods C, et al. Reduction in the incidence of acute myocardial infarction associated with a citywide smoking ordinance. *Circulation*. 2006; **114**(14): 1490-1496.
20. Bartholomew KS, Abouk R. The effect of local smokefree regulations on birth outcomes and prenatal smoking. *Mater Child Health J*. 2016; **20**(7): 1526-1538.
21. Basel P, Bartelson BB, Le Lait MC, Krantz MJ. The effect of a statewide smoking ordinance on acute myocardial infarction rates. *Am J Med*. 2014; **127**(1): 94 e1-94.e6.
22. Been JV, Millett C, Lee JT, van Schayck CP, Sheikh A. Smoke-free legislation and childhood hospitalisations for respiratory tract infections. *Eur Respir J*. 2015; **46**(3): 697-706.
23. Been JV, Szatkowski L, van Staa TP, et al. Smoke-free legislation and the incidence of paediatric respiratory infections and wheezing/asthma: interrupted time series analyses in the four UK nations. *Sci Rep*. 2015; **5**: 15246.
24. Been JV, Mackay DF, Millett C, Pell JP, van Schayck OC, Sheikh A. Impact of smoke-free legislation on perinatal and infant mortality: a national quasi-experimental study. *Sci Rep*. 2015; **5**: 13020.
25. Bharadwaj P, Johnsen JV, Løken KV. Smoking bans, maternal smoking and birth outcomes. *J Public Econ*. 2014; **115**: 72-93.
26. Bianchi M, Campi R, Bonati M. Smoke-free legislation and asthma. *N Engl J Med*. 2011; **364**(1): 87-88.
27. Bonetti PO, Trachsel LD, Kuhn MU, et al. Incidence of acute myocardial infarction after implementation of a public smoking ban in Graubünden, Switzerland: two year follow-up. *Swiss Med Wkly*. 2011; **141**: w13206.
28. Bowser D, Canning D, Okunogbe A. The impact of tobacco taxes on mortality in the USA, 1970-2005. *Tob Control*. 2016; **25**(1): 52-59.
29. Brintjes G, Bartelson BB, Hurst P, Levinson AH, Hokanson JE, Krantz MJ. Reduction in acute myocardial infarction hospitalization after implementation of a smoking ordinance. *Am J Med*. 2011; **124**(7): 647-654.
30. Carrión-Valero F, Quiles-Izquierdo J, González-Monte C, et al. Association between a comprehensive smoking ban and hospitalization for acute myocardial infarction: an observational study in the Autonomous Community of Valencia, Spain. *Rev Port Cardiol (Engl Ed)*. 2020; **39**(2): 77-84.
31. Carrión-Valero F, Quiles-Izquierdo J, González-Monte C, et al. Impact of the 2005 and 2010 Spanish smoking laws on hospital admissions for tobacco-related diseases in Valencia, Spain. *Public Health*. 2020; **180**: 29-37.
32. Cesaroni G, Forastiere F, Agabiti N, Valente P, Zuccaro P, Perucci CA. Effect of the Italian smoking ban on population rates of acute coronary events. *Circulation*. 2008; **117**(9): 1183-8.
33. Ciaccio CE, Gurley-Calvez T, Shireman TI. Indoor tobacco legislation is associated with fewer emergency department visits for asthma exacerbation in children. *Ann Allergy Asthma Immunol*. 2016; **117**(6): 641-645.
34. Cox B, Vangronsveld J, Nawrot TS. Impact of stepwise introduction of smoke-free legislation on population rates of acute myocardial infarction deaths in Flanders, Belgium. *Heart*. 2014; **100**(18): 1430-1435.
35. Croghan IT, Ebbert JO, Hays JT, et al. Impact of a countywide smoke-free workplace law on emergency department visits for respiratory diseases: a retrospective cohort study. *BMC Pulm Med*. 2015; **15**: 6.
36. Cronin EM, Kearney PM, Kearney PP, Sullivan P, Perry IJ. Impact of a national smoking ban on hospital admission for acute coronary syndromes: a longitudinal study. *Clin Cardiol*. 2012; **35**(4): 205-209.
37. de Korte-de Boer D, Kotz D, Viechtbauer W, et al. Effect of smoke-free legislation on the incidence of sudden circulatory arrest in the Netherlands. *Heart*. 2012; **98**(13): 995-9.

38. Dilley JA, Harris JR, Boysun MJ, Reid TR. Program, policy, and price interventions for tobacco control: quantifying the return on investment of a state tobacco control program. *Am J Public Health*. 2012; **102**(2): e22-8.
39. Di Valentino M, Muzzarelli S, Limoni C, et al. Reduction of ST-elevation myocardial infarction in Canton Ticino (Switzerland) after smoking bans in enclosed public places--No Smoke Pub Study. *Eur J Public Health*. 2015; **25**(2): 195-199.
40. Dove MS, Dockery DW, Mittleman MA, et al. The impact of Massachusetts' smoke-free workplace laws on acute myocardial infarction deaths. *Am J Public Health*. 2010; **100**(11): 2206-12.
41. Dove MS, Dockery DW, Connolly GN. Smoke-free air laws and asthma prevalence, symptoms, and severity among nonsmoking youth. *Pediatrics*. 2011; **127**(1): 102-9.
42. Durham AD, Bergier S, Morisod X, et al. Improved health of hospitality workers after a Swiss cantonal smoking ban. *Swiss Med Wkly*. 2011; **141**: w13317.
43. Eagan TM, Hetland J, Aarø LE. Decline in respiratory symptoms in service workers five months after a public smoking ban. *Tob Control*. 2006; **15**(3): 242-6.
44. Eisner MD, Smith AK, Blanc PD. Bartenders' respiratory health after establishment of smoke-free bars and taverns. *JAMA*. 1998; **280**(22): 1909-1914.
45. Evans WN, Ringel JS. Can higher cigarette taxes improve birth outcomes? *J Public Econ*. 1999; **72**(1): 135-54.
46. Farrelly MC, Nonnemaker JM, Chou R, Hyland A, Peterson KK, Bauer UE. Changes in hospitality workers' exposure to secondhand smoke following the implementation of New York's smoke-free law. *Tob Control*. 2005; **14**(4): 236-241.
47. Fernández E, Fu M, Pascual JA, et al. Impact of the Spanish smoking law on exposure to second-hand smoke and respiratory health in hospitality workers: a cohort study. *PLoS One*. 2009; **4**(1): e4244.
48. Ferrante D, Linetzky B, Virgolini M, Schoj V, Apelberg B. Reduction in hospital admissions for acute coronary syndrome after the successful implementation of 100% smoke-free legislation in Argentina: a comparison with partial smoking restrictions. *Tob Control*. 2012; **21**(4): 402-406.
49. Fichtenberg CM, Glantz SA. Association of the California Tobacco Control Program with declines in cigarette consumption and mortality from heart disease. *N Engl J Med*. 2000; **343**(24): 1772-1777.
50. Galán I, Simón L, Flores V, et al. Assessing the effects of the Spanish partial smoking ban on cardiovascular and respiratory diseases: methodological issues. *BMJ Open*. 2015; **5**(12): e008892.
51. Galán I, Simón L, Boldo E, et al. Changes in hospitalizations for chronic respiratory diseases after two successive smoking bans in Spain. *PLoS One*. 2017; **12**(5): e0177979.
52. Galán I, Simón L, Boldo E, et al. Impact of 2 Successive Smoking Bans on Hospital Admissions for Cardiovascular Diseases in Spain. *Rev Esp Cardiol (Eng Ed)*. 2018; **71**(9): 726-734.
53. Gao J, Baughman RA. Do Smoking Bans Improve Infant Health? Evidence from U.S. Births: 1995–2009. *East Econ J*. 2017; **43**(3): 472-495.
54. Gasparrini A, Gorini G, Barchielli A. On the relationship between smoking bans and incidence of acute myocardial infarction. *Eur J Epidemiol*. 2009; **24**(10): 597-602.
55. Gaudreau K, Sanford CJ, Cheverie C, McClure C. The effect of a smoking ban on hospitalization rates for cardiovascular and respiratory conditions in Prince Edward Island, Canada. *PLoS One*. 2013; **8**(3): e56102.
56. Goodman P, Agnew M, McCaffrey M, Paul G, Clancy L. Effects of the Irish smoking ban on respiratory health of bar workers and air quality in Dublin pubs. *Am J Respir Crit Care Med*. 2007; **175**(8): 840-5.
57. Gupta R, Luo J, Anderson RH, Ray A. Clean indoor air regulation and incidence of hospital admissions for acute coronary syndrome in Kanawha County, West Virginia. *Prev Chronic Dis*. 2011; **8**(4): A77.



58. Hahn EJ, Rayens MK, Burkhart PV, Moser DK. Smoke-free laws, gender, and reduction in hospitalizations for acute myocardial infarction. *Public Health Rep.* 2011; **126**(6): 826-833.
59. Hajdu T, Hajdu G. Smoking ban and health at birth: Evidence from Hungary. *Econ Hum Biol.* 2018; **30**: 37-47.
60. Hankins S, Tarasenko Y. Do smoking bans improve neonatal health? *Health Serv Res.* 2016; **51**(5): 1858-78.
61. Hatoun J, Davis-Plourde K, Penti B, Cabral H, Kazis L. Tobacco control laws and pediatric asthma. *Pediatrics.* 2018; **141**(Suppl 1): S130-s6.
62. Hawkins SS, Baum CF, Oken E, Gillman MW. Associations of tobacco control policies with birth outcomes. *JAMA Pediatr.* 2014; **168**(11): e142365.
63. Hawkins SS, Hristakeva S, Gottlieb M, Baum CF. Reduction in emergency department visits for children's asthma, ear infections, and respiratory infections after the introduction of state smoke-free legislation. *Prev Med.* 2016; **89**: 278-85.
64. Hawkins SS, Baum CF. The downstream effects of state tobacco control policies on maternal smoking during pregnancy and birth outcomes. *Drug Alcohol Depend.* 2019; **205**: 107634.
65. Hawkins SS, Baum CF. Impact of state tobacco control policies on birth defects. *Prev Med.* 2019; **127**: 105791.
66. Head P, Jackson BE, Bae S, Cherry D. Hospital discharge rates before and after implementation of a city-wide smoking ban in a Texas city, 2004-2008. *Prev Chronic Dis.* 2012; **9**: E179.
67. Herman PM, Walsh ME. Hospital admissions for acute myocardial infarction, angina, stroke, and asthma after implementation of Arizona's comprehensive statewide smoking ban. *Am J Public Health.* 2011; **101**(3): 491-6.
68. Ho V, Ross JS, Steiner CA, et al. A nationwide assessment of the association of smoking bans and cigarette taxes with hospitalizations for acute myocardial infarction, heart failure, and pneumonia. *Med Care Res Rev.* 2017; **74**(6): 687-704.
69. Holford TR, Meza R, Warner KE, et al. Tobacco control and the reduction in smoking-related premature deaths in the United States, 1964-2012. *JAMA.* 2014; **311**(2): 164-71.
70. Hone T, Szklo AS, Filippidis FT, et al. Smoke-free legislation and neonatal and infant mortality in Brazil: longitudinal quasi-experimental study. *Tob Control.* 2020; **29**(3): 312-9.
71. Humair JP, Garin N, Gerstel E, et al. Acute respiratory and cardiovascular admissions after a public smoking ban in Geneva, Switzerland. *PLoS One.* 2014; **9**(3): e90417.
72. Hurt RD, Weston SA, Ebbert JO, et al. Myocardial infarction and sudden cardiac death in Olmsted County, Minnesota, before and after smoke-free workplace laws. *Arch Intern Med.* 2012; **172**(21): 1635-41.
73. Jan C, Lee M, Roa R, Herrera V, Politis M, Motta J. The association of tobacco control policies and the risk of acute myocardial infarction using hospital admissions data. *PLoS One.* 2014; **9**(2): e88784.
74. Jarlenski M, Bleich SN, Bennett WL, Stuart EA, Barry CL. Medicaid enrollment policy increased smoking cessation among pregnant women but had no impact on birth outcomes. *Health Aff (Millwood).* 2014; **33**(6): 997-1005.
75. Jiang H, Livingston M, Room R, Gan Y, English D, Chenhall R. Can public health policies on alcohol and tobacco reduce a cancer epidemic? Australia's experience. *BMC Med.* 2019; **17**(1): 213.
76. Johnson EL, Beal JR. Impact of a comprehensive smoke-free law following a partial smoke-free law on incidence of heart attacks at a rural community hospital. *Nicotine Tob Res.* 2013; **15**(3): 745-747.
77. Juster HR, Loomis BR, Hinman TM, et al. Declines in hospital admissions for acute myocardial infarction in New York state after implementation of a comprehensive smoking ban. *Am J Public Health.* 2007; **97**(11): 2035-2039.
78. Kabir Z, Clarke V, Conroy R, McNamee E, Daly S, Clancy L. Low birthweight and preterm birth rates 1 year before and after the Irish workplace smoking ban. *BJOG.* 2009; **116**(13): 1782-1787.

79. Kabir Z, Daly S, Clarke V, Keogan S, Clancy L. Smoking ban and small-for-gestational age births in Ireland. *PLoS One*. 2013; **8**(3): e57441.
80. Kalkhoran S, Sebr e EM, Sandoya E, Glantz SA. Effect of Uruguay's National 100% Smokefree Law on Emergency Visits for Bronchospasm. *Am J Prev Med*. 2015; **49**(1): 85-8.
81. Kent BD, Sulaiman I, Nicholson TT, Lane SJ, Moloney ED. Acute pulmonary admissions following implementation of a national workplace smoking ban. *Chest*. 2012; **142**(3): 673-679.
82. Khuder SA, Milz S, Jordan T, Price J, Silvestri K, Butler P. The impact of a smoking ban on hospital admissions for coronary heart disease. *Prev Med*. 2007; **45**(1): 3-8.
83. Kim J, Kwon HJ, Lee K, et al. Air Quality, Biomarker Levels, and Health Effects on Staff in Korean Restaurants and Pubs Before and After a Smoking Ban. *Nicotine Tob Res*. 2015; **17**(11): 1337-1346.
84. Kong AY, Baggett CD, Gottfredson NC, Ribisl KM, Delamater PL, Golden SD. Associations of tobacco retailer availability with chronic obstructive pulmonary disease related hospital outcomes, United States, 2014. *Health Place*. 2021; **67**: 102464.
85. Landers G. The impact of smoke-free laws on asthma discharges: a multistate analysis. *Am J Public Health*. 2014; **104**(2): e74-e79.
86. Larsson M, Bo ethius G, Axelsson S, Montgomery SM. Exposure to environmental tobacco smoke and health effects among hospitality workers in Sweden--before and after the implementation of a smoke-free law. *Scand J Work Environ Health*. 2008; **34**(4): 267-77.
87. Lee SL, Wong WH, Lau YL. Smoke-free legislation reduces hospital admissions for childhood lower respiratory tract infection. *Tob Control*. 2016; **25**(e2): e90-e4.
88. Lemstra M, Neudorf C, Opondo J. Implications of a public smoking ban. *Can J Public Health*. 2008; **99**(1): 62-65.
89. Li X, Gao J, Zhang Z, et al. Lessons from an evaluation of a provincial-level smoking control policy in Shanghai, China. *PLoS One*. 2013; **8**(9): e74306.
90. Lippert WC, Gustat J. Clean Indoor Air Acts reduce the burden of adverse cardiovascular outcomes. *Public Health*. 2012; **126**(4): 279-85.
91. Liu A, Guzman Castillo M, Capewell S, Lucy J, O'Flaherty M. Reduction in myocardial infarction admissions in Liverpool after the smoking ban: potential socioeconomic implications for policymaking. *BMJ Open*. 2013; **3**(11): e003307.
92. Loomis BR, Juster HR. Association of indoor smoke-free air laws with hospital admissions for acute myocardial infarction and stroke in three states. *J Environ Public Health*. 2012; **2012**: 589018.
93. Ma ZQ, Kuller LH, Fisher MA, Ostroff SM. Use of interrupted time-series method to evaluate the impact of cigarette excise tax increases in Pennsylvania, 2000-2009. *Prev Chronic Dis*. 2013; **10**: E169.
94. MacCalman L, Semple S, Galea KS, et al. The relationship between workers' self-reported changes in health and their attitudes towards a workplace intervention: lessons from smoke-free legislation across the UK hospitality industry. *BMC Public Health*. 2012; **12**: 324.
95. Mackay D, Haw S, Ayres JG, Fischbacher C, Pell JP. Smoke-free legislation and hospitalizations for childhood asthma. *N Engl J Med*. 2010; **363**(12): 1139-1145.
96. Mackay DF, Nelson SM, Haw SJ, Pell JP. Impact of Scotland's smoke-free legislation on pregnancy complications: retrospective cohort study. *PLoS medicine*. 2012; **9**(3): e1001175.
97. Mackay DF, Haw S, Newby DE, et al. Impact of Scotland's comprehensive, smoke-free legislation on stroke. *PLoS One*. 2013; **8**(5): e62597.
98. Madureira J, Mendes A, Teixeira JP. Evaluation of a smoke-free law on indoor air quality and on workers' health in Portuguese restaurants. *J Occup Environ Hyg*. 2014; **11**(4): 201-209.
99. Mallma P, Carcamo C, Kaufman JS. The impact of anti-tobacco legislation on birth weight in Peru. *Glob Health Res Policy*. 2020; **5**: 5.
100. Markowitz S. The effectiveness of cigarette regulations in reducing cases of Sudden Infant Death Syndrome. *J Health Econ*. 2008; **27**(1): 106-133.

101. Markowitz S, Adams, E. K., Dietz, P. M., Tong, V. T., & Kannan, V. Tobacco control policies, birth outcomes, and maternal human capital. *J Hum Cap.* 2013; **7**(2): 130–160.
102. Mayne SL, Widome R, Carroll AJ, et al. Longitudinal associations of smoke-free policies and incident cardiovascular disease: CARDIA study. *Circulation.* 2018; **138**(6): 557-66.
103. Mayne SL, Jacobs DR, Jr., Schreiner PJ, Widome R, Gordon-Larsen P, Kershaw KN. Associations of smoke-free policies in restaurants, bars, and workplaces with blood pressure changes in the CARDIA study. *J Am Heart Assoc.* 2018; **7**(23): e009829.
104. McAlister AL, Huang P, Ramirez AG, Harrist RB, Fonseca VP. Reductions in cigarette smoking and acute myocardial infarction mortality in Jefferson County, Texas. *Am J Public Health.* 2010; **100**(12): 2391-2392.
105. McGhee SM, Wong CM, Schooling CM, et al. Smoke-free policies on population health outcomes. *Hong Kong Med J.* 2014; **20**(3 Suppl 3): 36-41.
106. McKinnon B, Auger N, Kaufman JS. The impact of smoke-free legislation on educational differences in birth outcomes. *J Epidemiol Community Health.* 2015; **69**(10): 937-43.
107. Menzies D, Nair A, Williamson PA, et al. Respiratory symptoms, pulmonary function, and markers of inflammation among bar workers before and after a legislative ban on smoking in public places. *JAMA.* 2006; **296**(14): 1742-1748.
108. Millett C, Lee JT, Lavery AA, Glantz SA, Majeed A. Hospital admissions for childhood asthma after smoke-free legislation in England. *Pediatrics.* 2013; **131**(2): e495-501.
109. Moraros J, Bird Y, Chen S, et al. The impact of the 2002 Delaware smoking ordinance on heart attack and asthma. *Int J Environ Res Public Health.* 2010; **7**(12): 4169-4178.
110. Naiman A, Glazier RH, Moineddin R. Association of anti-smoking legislation with rates of hospital admission for cardiovascular and respiratory conditions. *CMAJ.* 2010; **182**(8): 761-767.
111. Ozierański K, Witkowska A, Wojtyniak B, et al. Smoking ban in public places and myocardial infarction hospitalizations in a European country with high cardiovascular risk: insights from the Polish nationwide AMI-PL database. *Pol Arch Intern Med.* 2019; **129**(6): 386-391.
112. Page RL, 2nd, Slejko JF, Libby AM. A citywide smoking ban reduced maternal smoking and risk for preterm births: a Colorado natural experiment. *J Womens Health (Larchmt).* 2012; **21**(6): 621-627.
113. Patanavanich R, Glantz SA. Association between tobacco control policies and hospital admissions for acute myocardial infarction in Thailand, 2006-2017: A time series analysis. *PLoS One.* 2020; **15**(12): e0242570.
114. Patrick SW, Warner KE, Pordes E, Davis MM. Cigarette Tax Increase and Infant Mortality. *Pediatrics.* 2016; **137**(1):e20152901.
115. Peelen MJ, Sheikh A, Kok M, et al. Tobacco control policies and perinatal health: a national quasi-experimental study. *Sci Rep.* 2016; **6**: 23907.
116. Pell JP, Haw S, Cobbe S, et al. Smoke-free legislation and hospitalizations for acute coronary syndrome. *N Engl J Med.* 2008; **359**(5): 482-491.
117. Polus S, Burns J, Hoffmann S, et al. Interrupted time series study found mixed effects of the impact of the Bavarian smoke-free legislation on pregnancy outcomes. *Sci Rep.* 2021; **11**(1): 4209.
118. Rajkumar S, Schmidt-Trucksäss A, Wellenius GA, et al. The effect of workplace smoking bans on heart rate variability and pulse wave velocity of non-smoking hospitality workers. *Int J Public Health.* 2014; **59**(4): 577-585.
119. Rodu B, Peiper N, Cole P. Acute myocardial infarction mortality before and after state-wide smoking bans. *J Community Health.* 2012; **37**(2): 468-472.
120. Sargent RP, Shepard RM, Glantz SA. Reduced incidence of admissions for myocardial infarction associated with public smoking ban: before and after study. *BMJ.* 2004; **328**(7446): 977-980.
121. Sargent JD, Demidenko E, Malenka DJ, Li Z, Gohlke H, Hanewinkel R. Smoking restrictions and hospitalization for acute coronary events in Germany. *Clin Res Cardiol.* 2012; **101**(3): 227-235.

122. Schoj V, Alderete M, Ruiz E, Hasdeu S, Linetzky B, Ferrante D. The impact of a 100% smoke-free law on the health of hospitality workers from the city of Neuquén, Argentina. *Tob Control*. 2010; **19**(2): 134-137.
123. Sebríe EM, Sandoya E, Hyland A, Bianco E, Glantz SA, Cummings KM. Hospital admissions for acute myocardial infarction before and after implementation of a comprehensive smoke-free policy in Uruguay. *Tob Control*. 2013; **22**(e1): e16-e20.
124. Séguret F, Ferreira C, Cambou JP, Carrière I, Thomas D. Changes in hospitalization rates for acute coronary syndrome after a two-phase comprehensive smoking ban. *Eur J Prev Cardiol*. 2014; **21**(12): 1575-1582.
125. Sen A, Piérard E. Estimating the effects of cigarette taxes on birth outcomes. *Can Public Policy*. 2011; **37**(2): 257-276.
126. Seo DC, Torabi MR. Reduced admissions for acute myocardial infarction associated with a public smoking ban: matched controlled study. *J Drug Educ*. 2007; **37**(3): 217-226.
127. Shelley D, Yerneni R, Hung D, Das D, Fahs M. The relative effect of household and workplace smoking restriction on health status among Chinese Americans living in New York City. *J Urban Health*. 2007; **84**(3): 360-371.
128. Shetty KD, DeLeire T, White C, Bhattacharya J. Changes in U.S. hospitalization and mortality rates following smoking bans. *J Policy Anal Manage*. 2010; **30**(1): 6-28.
129. Simón L, Pastor-Barriuso R, Boldo E, et al. Smoke-Free Legislation in Spain and Prematurity. *Pediatrics*. 2017; **139**(6).
130. Sims M, Maxwell R, Bauld L, Gilmore A. Short term impact of smoke-free legislation in England: retrospective analysis of hospital admissions for myocardial infarction. *BMJ*. 2010; **340**: c2161.
131. Stallings-Smith S, Zeka A, Goodman P, Kabir Z, Clancy L. Reductions in cardiovascular, cerebrovascular, and respiratory mortality following the national Irish smoking ban: interrupted time-series analysis. *PLoS One*. 2013; **8**(4): e62063.
132. Stallings-Smith S, Goodman P, Kabir Z, Clancy L, Zeka A. Socioeconomic differentials in the immediate mortality effects of the national Irish smoking ban. *PLoS One*. 2014; **9**(6): e98617.
133. Thach TQ, McGhee SM, So JC, et al. The smoke-free legislation in Hong Kong: its impact on mortality. *Tob Control*. 2016; **25**(6): 685-691.
134. Trachsel LD, Kuhn MU, Reinhart WH, Schulzki T, Bonetti PO. Reduced incidence of acute myocardial infarction in the first year after implementation of a public smoking ban in Graubünden, Switzerland. *Swiss Med Wkly*. 2010; **140**(9-10): 133-8.
135. Vander Weg MW, Rosenthal GE, Vaughan Sarrazin M. Smoking bans linked to lower hospitalizations for heart attacks and lung disease among medicare beneficiaries. *Health Aff (Millwood)*. 2012; **31**(12): 2699-2707.
136. Vicedo-Cabrera AM, Schindler C, Radovanovic D, et al. Benefits of smoking bans on preterm and early-term births: a natural experimental design in Switzerland. *Tob Control*. 2016; **25**(e2): e135-e41.
137. Vicedo-Cabrera AM, Rössli M, Radovanovic D, et al. Cardiorespiratory hospitalisation and mortality reductions after smoking bans in Switzerland. *Swiss Med Wkly*. 2016; **146**: w14381.
138. Villalbí JR, Sánchez E, Benet J, et al. The extension of smoke-free areas and acute myocardial infarction mortality: before and after study. *BMJ Open*. 2011; **1**(1): e000067.
139. Weaver AM, Wang Y, Rupp K, Watson DP. Effects of smoke-free air law on acute myocardial infarction hospitalization in Indianapolis and Marion County, Indiana. *BMC Public Health*. 2018; **18**(1): 232.
140. Wilson T, Shamo F, Boynton K, Kiley J. The impact of Michigan's Dr Ron Davis smoke-free air law on levels of cotinine, tobacco-specific lung carcinogen and severity of self-reported respiratory symptoms among non-smoking bar employees. *Tob Control*. 2012; **21**(6): 593-595.

141. Wu Y, Wang Z, Zheng Y, et al. The impact of comprehensive tobacco control policies on cardiovascular diseases in Beijing, China. *Addiction*. 2021; **116**(8): 2175-2184.
142. Xiao H, Zhang H, Wang D, et al. Impact of smoke-free legislation on acute myocardial infarction and stroke mortality: Tianjin, China, 2007-2015. *Tob Control*. 2020; **29**(1): 61-67.
143. Xiao H, Qi F, Jia X, et al. Impact of Qingdao's smoke-free legislation on hospitalizations and mortality from acute myocardial infarction and stroke: an interrupted time-series analysis. *Addiction (Abingdon, England)* 2020; **115**(8): 1561-1570.
144. Yan J. The Effects of a Minimum Cigarette Purchase Age of 21 on Prenatal Smoking and Infant Health. *East Econ J*. 2014; **40**(3): 289-308.
145. Yang YN, Huang YT, Yang CY. Effects of a national smoking ban on hospital admissions for cardiovascular diseases: a time-series analysis in Taiwan. *J Toxicol Environ Health A*. 2017; **80**(10-12): 562-568.
146. Yıldız F, Barış SA, Başığit I, Boyacı H, Aydınlık H, Sönmez P. Role of smoke-free legislation on emergency department admissions for smoking-related diseases in Kocaeli, Turkey. *East Mediterr Health J*. 2015; **20**(12): 774-780.
147. WHO. WHO report on the global tobacco epidemic, 2017. *Monitoring tobacco use and prevention policies* Geneva:World Health Organization, 2017.
