# Supplementary material for: Evaluation of Population-Level Tobacco Control Interventions and Health Outcomes: A Systematic Review and Meta-Analysis
Source: PubMed Central journal article supplement (PMC10329215; doi:10.1001/jamanetworkopen.2023.22341), 2023-07-07
Supplement: jamanetwopen-e2322341-s002.pdf [file jamanetwopen-e2322341-s002.pdf]

## Data Sharing Statement

Akter. Evaluation of Population-Level Tobacco Control Interventions and Health Outcomes. *JAMA Netw Open*. Published July 07, 2023. doi:10.1001/jamanetworkopen.2023.22341

### Data

**Data available:** No

### Additional Information

**Explanation for why data not available:** The present study is a systematic review and meta-analysis, and we have no additional data to share.
